1 **TITLE**

2 An important role for triglyceride in regulating spermatogenesis

3

4 **AUTHORS**

5 Charlotte F. Chao<sup>1&</sup>, Yanina-Yasmin Pesch<sup>1&</sup>, Huaxu Yu<sup>2</sup>, Chenjingyi Wang<sup>2</sup>, Maria

6 Aristizabal<sup>3</sup>, Tao Huan<sup>2</sup>, Guy Tanentzapf<sup>1</sup>, Elizabeth J. Rideout<sup>1\*</sup>

7

8 **AFFILIATIONS**

9 <sup>1</sup> Department of Cellular and Physiological Sciences, Life Sciences Institute, The  
10 University of British Columbia, Vancouver, BC, Canada V6T 1Z3

11 <sup>2</sup> Department of Chemistry, The University of British Columbia, Vancouver, BC, Canada  
12 V6T 1Z1

13 <sup>3</sup> Department of Biology, Queen's University, Kingston, ON, Canada K7L 3N6

14 \* Corresponding author

15

16

---

& Equally contributing authors

\* Correspondence: [elizabeth.rideout@ubc.ca](mailto:elizabeth.rideout@ubc.ca)

17 **ABSTRACT**

18 *Drosophila* is a powerful model to study how lipids affect spermatogenesis. Yet, the  
19 contribution of neutral lipids, a major lipid group which resides in organelles called lipid  
20 droplets (LD), to normal sperm development is largely unknown. Emerging evidence  
21 suggests that LD are present in the testis and that loss of neutral lipid- and LD-  
22 associated genes causes subfertility; however, key regulators of testis neutral lipids and  
23 LD remain unclear. Here, we show that LD are present in early-stage somatic and  
24 germline cells within the *Drosophila* testis. We identified a role for triglyceride lipase  
25 *brummer* (*bmm*) in regulating testis LD, and found that whole-body loss of *bmm* leads to  
26 defects in sperm development. Importantly, these represent cell-autonomous roles for  
27 *bmm* in regulating testis LD and spermatogenesis. Because lipidomic analysis of *bmm*  
28 mutants revealed excess triglyceride accumulation, and spermatogenic defects in *bmm*  
29 mutants were rescued by genetically blocking triglyceride synthesis, our data suggest  
30 that *bmm*-mediated regulation of triglyceride influences sperm development. This  
31 identifies triglyceride as an important neutral lipid that contributes to *Drosophila* sperm  
32 development, and reveals a key role for *bmm* in regulating testis triglyceride levels  
33 during spermatogenesis.

34

35 **KEYWORDS**

36 Triglyceride, lipid droplet, spermatogenesis, testis, *brummer*, adipose triglyceride lipase

37 (ATGL), lipidomics.

38

## 39 INTRODUCTION

40 Lipids play an essential role in regulating spermatogenesis across animals [1–4].  
41 Studies in *Drosophila* have illuminated key roles for multiple lipid species in regulating  
42 sperm development [5–7]. For example, phosphatidylinositol and its phosphorylated  
43 derivatives participate in diverse aspects of *Drosophila* spermatogenesis including  
44 meiotic cytokinesis [1,8–11], somatic cell differentiation [12], germline and somatic cell  
45 polarity maintenance [13–16], and germline stem cell (GSC) maintenance and  
46 proliferation [17]. Membrane lipids also influence sperm development [18,19], whereas  
47 fatty acids play a role in processes such as meiotic cytokinesis [20] and sperm  
48 individualization [21,22]. While these studies suggest key roles for membrane lipids and  
49 fatty acids during *Drosophila* spermatogenesis, some of which are conserved in  
50 mammals [23–25], much less is known about how neutral lipids contribute to  
51 spermatogenesis.

52 Neutral lipids are a major lipid group that includes triglyceride and cholesterol  
53 ester, and reside within specialized organelles called lipid droplets (LD) [26]. LD are  
54 found in diverse cell types (*e.g.* adipocytes, muscle, liver, glia, neurons) [27,28,26], and  
55 play key roles in maintaining cellular lipid homeostasis. In nongonadal cell types, correct  
56 regulation of LD contributes to cellular energy production [29–31], sequestration and  
57 redistribution of lipid precursors [32–36], and regulation of lipid toxicity [37–39]. The  
58 importance of LD to normal cellular function in nongonadal cell types is shown by the  
59 fact that dysregulation of LD causes defects in cell differentiation, survival, and energy  
60 production [26,37,40,41]. In the testis, much less is known about the regulation and  
61 function of neutral lipids and LD, and how this regulation affects sperm development.

62 Multiple lines of evidence suggest a potential role for neutral lipids and LD during  
63 spermatogenesis. First, genes that encode proteins associated with neutral lipid  
64 metabolism and LD are expressed in the testis across multiple species [42–44].  
65 Second, testis LD have been identified in mammals and flies under both normal  
66 physiological conditions [27,44–48] and after mitochondrial stress [49]. Third, loss of  
67 genes associated with neutral lipid metabolism and LD cause subfertility phenotypes in  
68 both flies and mammals [27,50–52]. While studies suggest that mammalian testis LD  
69 contribute to steroidogenesis [53,54], the spatial, temporal, and cell-type specific  
70 requirements for neutral lipids and LD in the testis have not been explored in detail in  
71 any animal. It remains similarly unclear which genes are responsible for regulating  
72 neutral lipids and LD during spermatogenesis.

73 To address these knowledge gaps, we used *Drosophila* to investigate the  
74 regulation and function of neutral lipids and LD during sperm development. Our detailed  
75 analysis of spermatogenesis under normal physiological conditions revealed the  
76 presence of LD in early-stage somatic and germline cells in the testis. We identified  
77 triglyceride lipase *brummer* (*bmm*) as a regulator of testis LD, and showed that this  
78 represents a cell-autonomous role for *bmm*. Importantly, we found that the *bmm*-  
79 mediated regulation of testis LD was significant for spermatogenesis, as both whole-  
80 body and cell-autonomous loss of *bmm* caused defects in sperm development. Given  
81 that our lipidomic analysis revealed an excess accumulation of triglyceride in animals  
82 lacking *bmm*, and that genetically blocking triglyceride synthesis rescued many  
83 spermatogenic defects associated with *bmm* loss, our data suggests that *bmm*-  
84 mediated regulation of triglyceride is important for normal *Drosophila* sperm

85 development. This reveals previously unrecognized roles for neutral lipids such as  
86 triglyceride in regulating spermatogenesis, and for *bmm* in regulating sperm  
87 development under normal physiological conditions. Together, these findings advance  
88 knowledge of the regulation and function of neutral lipids during spermatogenesis.

89

## 90 **RESULTS**

### 91 **Lipid droplets are present in early-stage somatic and germline cells**

92 We previously reported the presence of small circular punctae (<1  $\mu\text{m}$ ) corresponding to  
93 LD near the apical tip of the testis [27]. We confirm these results in *w<sup>1118</sup>* males using  
94 neutral lipid stain BODIPY (4,4-Difluoro-1,3,5,7,8-Pentamethyl-4-Bora-3a,4a-Diaza-s-  
95 Indacene) (Figure 1A). Importantly, we reproduced this spatial distribution of LD in two  
96 independent genetic backgrounds and at two additional ages (Figure 1B,1C). In all  
97 cases, LD were in a testis region that contains stem cells and early-stage somatic and  
98 germline cells (Figure 1A-A', arrows), and in the hub, an organizing center and stem cell  
99 niche in the *Drosophila* testis (Figure 1A''-A''', arrows) [55]. LD were largely absent from  
100 the testis region occupied by spermatocytes (Figure 1A and A', arrowheads). While LD  
101 may contain multiple neutral lipid species[56], cholesterol-binding fluorescent polyene  
102 antibiotic filipin III did not detect cholesterol within testis LD (Figure S1A), suggesting  
103 triglyceride is the main neutral lipid in *Drosophila* testis LD.

104 *Drosophila* spermatogenesis requires the codevelopment and differentiation of  
105 two cell lineages, the germline and the somatic cells [57]. To identify LD in each lineage,  
106 we used the GAL4/UAS system to overexpress a transgene in which GFP is fused to  
107 the LD-targeting motif of motor protein Klarsicht [58] (*UAS-GFP-LD*). We targeted *UAS-*

108 *GFP-LD* to somatic cells with *Traffic jam (Tj)*-*GAL4* and to the germline using *nanos*  
109 *(nos)*-*GAL4*; LD were visualized using neutral lipid dye LipidTox. We found LD in the  
110 somatic cells of 0-day-old males (Figure 1D), and showed that the majority of somatic  
111 LD were <30  $\mu\text{m}$  from the hub (Figure 1E). Because the somatic LD distribution  
112 coincided with a marker for somatic stem cells and their immediate daughter cells (Zinc  
113 finger homeodomain 1, *Zfh-1*) (Figure 1F; two-sample Kolmogorov-Smirnov test) [59],  
114 but not with a marker for late somatic cells (*Eyes absent*, *Eya*) [12,60], our data  
115 suggests LD are present in early somatic cells. In the germline, GFP punctae  
116 corresponding to LD were found near the apical tip of the testis in 0-day-old males  
117 (Figure 1G,H). We found that the disappearance of germline LD coincided with peak  
118 expression of a GFP reporter that reflects the expression of Bag-of-marbles (*Bam*)  
119 protein in the testis (*Bam-GFP*) [61] (Figure 1I,1J). Because peak *Bam* expression  
120 signals the last round of transient amplifying mitotic cell cycle prior to the germline's  
121 transition into the meiotic cell cycle [62–64], our data suggests that germline LD, like  
122 somatic LD, are present at early stages of germline development.

123

#### 124 ***brummer* plays a cell-autonomous role in regulating testis lipid droplets**

125 *Adipose triglyceride lipase (ATGL)* is a critical regulator of neutral lipid metabolism and  
126 LD [65–74]. Loss of *ATGL* in many cell types triggers LD accumulation, and *ATGL*  
127 overexpression decreases LD number [30,67,68,71,73,73,75,76]. Given that the  
128 *Drosophila ATGL* homolog *brummer (bmm)* regulates testis LD induced by  
129 mitochondrial stress [49], we explored whether *bmm* regulates testis LD under normal  
130 physiological conditions. We first examined *bmm* expression in the testis by isolating

131 this organ from flies in which a *bmm* promoter fragment drives *GFP* expression (*bmm*-  
132 *GFP*). Indeed, *bmm-GFP* accurately reproduces changes to *bmm* mRNA levels [77].  
133 *GFP* expression was present in the germline of *bmm-GFP* testes, and we found  
134 germline *GFP* levels were higher in spermatocytes than at earlier stages of sperm  
135 development (Figure 2A,2B; one-way ANOVA with Tukey multiple comparison test).  
136 Supporting this, our analysis of a publicly available single-cell RNA sequencing data set  
137 of the male reproductive organ [78] suggested a similar trend in *bmm* mRNA levels  
138 between different stages of germline (Figure S2A,S2B) and somatic cell (Figure  
139 S2C,S2D) development. Importantly, germline *GFP* levels were negatively correlated  
140 with testis LD in *bmm-GFP* flies (Figure 2A,2C), suggesting regions with higher *bmm*  
141 expression had fewer LD.

142 To test whether *bmm* regulates testis LD, we compared LD in testes from 0-day-  
143 old males carrying a loss-of-function mutation in *bmm* (*bmm*<sup>1</sup>) to control male testes  
144 (*bmm*<sup>rev</sup>)[67]. *bmm*<sup>1</sup> testes had significantly more LD across all LD sizes compared with  
145 control males (Figure 2D–2G; Welch two-sample t-test with Bonferroni correction), and  
146 showed a significantly expanded LD distribution (Figure 2D–2F,2H; two-sample  
147 Kolmogorov-Smirnov test). This suggests *bmm* normally restricts LD to the region near  
148 the apical tip of the testis, a role we confirm in both somatic and germline lineages  
149 (Figure S2E–S2H). Importantly, after inducing homozygous *bmm*<sup>1</sup> or *bmm*<sup>rev</sup> clones in  
150 the testes using *FLP-FRT* system[79], we found *bmm*<sup>1</sup> spermatocyte clones had  
151 significantly more LD at 3 days post-clone induction (Figure 2I; Welch two-sample t-  
152 test), a stage at which LD were absent from *bmm*<sup>rev</sup> clones. This indicates a previously



153 unrecognized cell-autonomous role for *bmm* in regulating testis LD, a role we were  
154 unable to assess in somatic cells as we recovered no *bmm*<sup>1</sup> somatic cell clones.

155

### 156 ***brummer* plays a cell-autonomous role in regulating germline development**

157 To determine the physiological significance of *bmm*-mediated regulation of testis LD, we  
158 investigated testis and sperm development in males without *bmm* function. In 0-day-old  
159 *bmm*<sup>1</sup> males reared at 25°C, testis size was significantly smaller than in age-matched  
160 *bmm*<sup>rev</sup> controls (Figure S3A; Welch two-sample t-test), and the number of spermatid  
161 bundles was significantly lower (Figure S3B; Kruskal-Wallis rank sum test). Defects in  
162 testis size and sperm development were also observed in 14-day-old *bmm*<sup>1</sup> males  
163 (Figure S3C,S3D Welch two-sample t-test). When the animals were reared at 29°C, a  
164 temperature that exacerbates spermatogenesis defects associated with changes in lipid  
165 metabolism [21], *bmm*<sup>1</sup> phenotypes were more pronounced (Figure 3A-3C). This  
166 suggests loss of *bmm* affects testis development and spermatogenesis. Because similar  
167 phenotypes are observed in male mice without ATGL [52], and supplementing the diet  
168 of *bmm*<sup>1</sup> males with medium-chain triglycerides (MCT) partially rescues the testis and  
169 spermatogenic defects we observed in flies (Figure S3E,S3F; one-way ANOVA with  
170 Tukey multiple comparison test), as it does in mice [52,80], our data suggests flies are a  
171 good model to study how *bmm*/*ATGL* influences sperm development.

172 To explore spermatogenesis in *bmm*<sup>1</sup> animals, we used germline-specific marker  
173 Vasa to visualize the germline in the testes of *bmm*<sup>1</sup> and *bmm*<sup>rev</sup> males (Figure 3D,3E)  
174 [81]. We observed a significant increase in the number of germline stem cells (GSC)  
175 (Figure 3F; Kruskal-Wallis rank sum test) and higher variability in GSC number in *bmm*<sup>1</sup>

176 males ( $p=5.7\times 10^{-12}$  by F-test). Given that GSC number is affected by hub size and GSC  
177 proliferation [82,83], we monitored both parameters in *bmm*<sup>1</sup> and *bmm*<sup>rev</sup> controls. While  
178 hub size in *bmm*<sup>1</sup> testes was significantly larger than in testes from *bmm*<sup>rev</sup> controls  
179 (Figure S3G,S3H; Welch two-sample t-test), the number of phosphohistone H3-positive  
180 GSC, which indicates proliferating GSC, was unchanged in *bmm*<sup>1</sup> animals (Figure S3I;  
181 Kruskal-Wallis rank sum test). While this indicates a larger hub may partly explain  
182 *bmm*'s effect on GSC number, *bmm* also plays a cell-autonomous role in regulating  
183 GSC, as we recovered a higher proportion of *bmm*<sup>1</sup> clones in the GSC pool compared  
184 with *bmm*<sup>rev</sup> clones at 14 days after clone induction (Figure 3G; Welch two-sample t-  
185 test).

186         Beyond GSC, we uncovered additional spermatogenesis defects in *bmm*<sup>1</sup> testes.  
187 Peak Bam-GFP expression in testes from 0-day-old *bmm*<sup>1</sup> and *bmm*<sup>rev</sup> males showed  
188 that GFP-positive cysts with were significantly further away from the hub in *bmm*<sup>1</sup> testes  
189 (Figure 3H,S3J; Welch two-sample t-test). Indeed, 15/18 *bmm*<sup>1</sup> testes contained Vasa-  
190 positive cysts with large nuclei in the distal half of the testis (Figure 3I, arrowheads), a  
191 phenotype not present in *bmm*<sup>rev</sup> testes (0/8) ( $p=0.0005$  by Pearson's Chi-square test).  
192 Because these phenotypes are also seen in testes with differentiation defects [13,84],  
193 we recorded the stage of sperm development reached by the germline in *bmm*<sup>1</sup> testes.  
194 Most *bmm*<sup>1</sup> testes contained post-meiotic cells in males raised at 25°C (Figure S3K);  
195 however, germline development did not progress past the spermatocyte stage in most  
196 *bmm*<sup>1</sup> testes from animals raised at 29°C (Figure S3K). Testes from *bmm*<sup>1</sup> males reared  
197 at 25°C also had a smaller Boule-positive area (Figure 3J,S3L; Welch two-sample t-  
198 test), and fewer individualization complexes and waste bags (Figure S3M,S3N; Kruskal-

199 Wallis rank sum test). Together, these data indicate loss of *bmm* delays germline  
200 development. Because we recovered fewer *bmm*<sup>1</sup> spermatocyte and spermatid clones  
201 14 days after clone induction (Figure 3K,3L; Kruskal-Wallis rank sum test), this effect on  
202 germline development represents a cell-autonomous role for *bmm*.

203

204 ***brummer*-dependent regulation of testis triglyceride levels affects**  
205 **spermatogenesis**

206 *ATGL* catalyzes the first and rate-limiting step of triglyceride hydrolysis [73,85,86]. Loss  
207 of this enzyme or its homologs leads to excess triglyceride accumulation  
208 [27,30,67,73,75] and shifts in multiple lipid classes [66,87–89]. To determine how loss of  
209 *bmm* affects spermatogenesis, we carried out mass spectrometry (MS)-based  
210 untargeted lipidomic profiling of *bmm*<sup>1</sup> and *bmm*<sup>rev</sup> males. Hierarchical clustering of lipid  
211 species suggests that *bmm*<sup>1</sup> and *bmm*<sup>rev</sup> males show distinct lipidomic profiles (Figure  
212 4A). Overall, we detected 2464 and 1144 lipid features with high quantitative confidence  
213 in positive and negative ion modes, respectively. By matching experimental *m/z*,  
214 isotopic ratio, and tandem MS spectra to lipid libraries, we confirmed 293 unique lipid  
215 species (Supplemental table 1). We found 107 lipids had a significant change in  
216 abundance between *bmm*<sup>1</sup> and *bmm*<sup>rev</sup> males ( $p_{\text{adj}} < 0.05$ ): 85 species were upregulated  
217 in *bmm*<sup>1</sup> males and 22 lipid species were downregulated. Among differentially regulated  
218 species from different lipid classes, triglyceride had the largest residual above expected  
219 proportion ( $p = 5.00 \times 10^{-4}$  by Pearson's Chi-squared test). This suggests triglyceride is the  
220 lipid class most affected by loss of *bmm* (Figure 4B,4C).

221 In *bmm*<sup>1</sup> males, most triglyceride species (55/97) were significantly higher.  
222 Because we observed a positive correlation between the fold increase in triglyceride  
223 abundance with both the number of double bonds ( $p=7.52\times 10^{-8}$  by Kendall's rank  
224 correlation test; Figure S4A) and the number of carbons ( $p=2.77\times 10^{-10}$  by Kendall's rank  
225 correlation test; Figure S4B), our data align well with *bmm*/*ATGL*'s known role in  
226 regulating triglyceride levels[67,68,73] and its substrate preference of long-chain  
227 polyunsaturated fatty acids[85]. While we also detected changes in species such as  
228 fatty acids, acylcarnitine, and membrane lipids (Figure S4C–S4H), in line with recent  
229 *Drosophila* lipidomic data[90,91], the striking accumulation of triglyceride in *bmm*<sup>1</sup> males  
230 suggested that excess testis triglyceride in *bmm*<sup>1</sup> males may contribute to their  
231 spermatogenic defects. To test this, we examined spermatogenesis in *bmm*<sup>1</sup> males  
232 carrying loss-of-function mutations in *midway* (*mdy*). *mdy* is the *Drosophila* homolog of  
233 *diacylglycerol O-acyltransferase 1* (*DGAT1*), and whole-body loss of *mdy* reduces  
234 whole-body triglyceride levels[92–94]. Importantly, testes isolated from males lacking  
235 both *bmm* and *mdy* (genotype *mdy*<sup>QX25/k03902</sup>;*bmm*<sup>1</sup>) had fewer LD than testes dissected  
236 from *bmm*<sup>1</sup> males (Figures 4D,S4I; one-way ANOVA with Tukey multiple comparison  
237 test).

238 We found that testes isolated from *mdy*<sup>QX25/k03902</sup>;*bmm*<sup>1</sup> males were significantly  
239 larger and had more spermatid bundles than testes from *bmm*<sup>1</sup> males (Figure 4E–G;  
240 one-way ANOVA with Tukey multiple comparison test). The elevated number of GSC in  
241 *bmm*<sup>1</sup> male testes was similarly rescued in *mdy*<sup>QX25/k03902</sup>;*bmm*<sup>1</sup> males (Figure 4H; one-  
242 way ANOVA with Tukey multiple comparison test). These data suggest that defective  
243 spermatogenesis in *bmm*<sup>1</sup> males can be partly attributed to excess triglyceride

244 accumulation. Notably, at least some of these defects are cell-autonomous: RNAi-  
245 mediated knockdown of *mdy* in the germline of *bmm*<sup>1</sup> males partially rescued the  
246 defects in testis size (Figure 4I; Kruskal-Wallis rank sum test with Dunn's multiple  
247 comparison test) and GSC variance (Figure S4J;  $p=4.5 \times 10^{-5}$  and  $8.2 \times 10^{-3}$  by F-test  
248 from the GAL4- and UAS-only crosses, respectively). *bmm*-mediated regulation of testis  
249 triglyceride therefore plays a previously unrecognized role in regulating sperm  
250 development.

251

## 252 **DISCUSSION**

253 In this study, we used *Drosophila* to gain insight into how the neutral lipids, a major lipid  
254 class, contribute to sperm development. We describe the distribution of LD under  
255 normal physiological conditions in the *Drosophila* testis, and show that LD are present  
256 at the early stages of development in both somatic and germline cells. While many  
257 factors are known to regulate LD in nongonadal cell types, we reveal a cell-autonomous  
258 role for triglyceride lipase *bmm* in regulating testis LD during spermatogenesis. Indeed,  
259 our data indicates loss of *bmm* delays germline differentiation leading to an  
260 accumulation of early-stage germ cells. These defects in germline differentiation can be  
261 partially explained by the excess accumulation of triglyceride in flies lacking *bmm*, as  
262 genetically blocking triglyceride synthesis rescues multiple spermatogenic defects in  
263 *bmm* mutants. Together, our data reveals previously unrecognized roles for LD and  
264 triglycerides during spermatogenesis, and for *bmm* as an important regulator of testis  
265 LD and germline development under normal physiological conditions.

266

267           One key outcome of our study was increased knowledge of LD regulation and  
268 function in the testis. Despite rapidly expanding knowledge of LD in cell types such as  
269 adipocytes or skeletal muscle, less is known about how LD influence spermatogenesis  
270 under normal physiological conditions. In mammals, testis LD contain cholesterol and  
271 play a role in promoting steroidogenesis [95,96]. In flies, we show that LD are present in  
272 the testis, and that excess accumulation of these LD affects sperm development. In  
273 nongonadal cell types, triglycerides provide a rich source of fatty acids for cellular ATP  
274 production, lipid building blocks to support membrane homeostasis and growth, and  
275 metabolites that can act as signaling molecules [26]. Because ATP production, lipid  
276 precursors, and lipid signaling all play roles in supporting normal sperm development  
277 [97,98], future studies will need to determine how each of these processes is affected  
278 when excess triglyceride accumulates in testis LD. This will provide critical insight into  
279 how triglyceride stored within testis LD contributes to overall cellular lipid metabolism  
280 during spermatogenesis. Because of the parallel spermatogenic defects we observed in  
281 *bmm* mutants and *ATGL*-deficient mice, we expect that these mechanisms will also  
282 operate in other species.

283           A more comprehensive understanding of neutral lipid metabolism during sperm  
284 development will also emerge from studies on the upstream signaling networks that  
285 regulate testis LD and triglyceride. Given that we show an important and cell-  
286 autonomous role for *bmm* in regulating testis LD and triglyceride, future studies will  
287 need to identify factors that regulate *bmm* in the testis. Based on public single-cell  
288 RNAseq data and the *bmm-GFP* reporter strain, our data suggest *bmm* mRNA levels  
289 are differentially regulated between early and later stages of sperm development.

290 Candidates for mediating this regulation include the insulin/insulin-like growth factor  
291 signaling pathway (IIS), Target of rapamycin (TOR) pathway, and nuclear factor  
292  $\kappa$ B/Relish pathway (NF $\kappa$ B), as all of these pathways influence *bmm* mRNA levels in  
293 nongonadal cell types [99–105]. Beyond mRNA levels, Bmm protein levels and post-  
294 translational modifications may also be differentially regulating during spermatogenesis.  
295 For example, studies show that the proteins encoded by *bmm* homologs in other  
296 animals are regulated by phosphorylation [106], mediated by kinases such as  
297 adenosine monophosphate-activated protein kinase (AMPK) and protein kinase A  
298 (PKA) [107–109]. Importantly, many of these pathways, including IIS, TOR, AMPK,  
299 NF $\kappa$ B and possibly PKA influence *Drosophila* sperm development [110–115]. Identifying  
300 the signaling networks that influence *bmm* regulation during sperm development will  
301 therefore lead to a deeper understanding of how testis LD and triglyceride are  
302 coordinated with physiological factors to promote normal spermatogenesis. Because  
303 pathways such as IIS and AMPK, and others, regulate sperm development in other  
304 species [116–118], these insights may reveal conserved mechanisms that govern the  
305 regulation of cellular neutral lipid metabolism during sperm development.

306

307

308

## 309 **ACKNOWLEDGEMENTS**

310 We thank Dr. Ronald Kühnlein for *bmm*<sup>1</sup> and *bmm*<sup>rev</sup> lines [67], Dr. Michael Welte for  
311 *UAS-GFP-LD*[58], and Dr. Kaeko Kamei for *bmm-GFP* [77]. We used stocks from the  
312 Bloomington *Drosophila* Stock Center (NIH P40OD018537) and Vienna *Drosophila*  
313 Resource Center (VDRC). We acknowledge critical resources and information provided  
314 by FlyBase [119] (supported by the National Human Genome Research Institute at the  
315 U.S. National Institutes of Health ([U41 HG000739](#)) and the British Medical Research  
316 Council ([MR/N030117/1](#))). This work was supported by the Life Sciences Institutes  
317 Imaging Core, supported by the UBC GREx Biological Resilience Initiative. Funding for  
318 this study was provided by grants to EJR from the Canadian Institutes for Health  
319 Research (PJT-153072), Michael Smith Foundation for Health Research (16876), and  
320 the Canadian Foundation for Innovation (JELF-34879). GT was supported by a grant  
321 from the Natural Sciences and Engineering Research Council (NSERC; 2018-04648),  
322 TH/HY/CW were supported by NSERC (2020-04895), MA was supported by the  
323 Jacob's foundation. We would like to acknowledge that our research takes place on the  
324 traditional, ancestral, and unceded territory of the Musqueam people; a privilege for  
325 which we are grateful.

326

## 327 **AUTHOR CONTRIBUTIONS**

328 Conceptualization, C.C. and E.J.R.; Methodology, C.C. and Y.Y.P.; Software, C.C.;  
329 Investigation, C.C., H.Y., and Y.Y.P.; Lipidomics, M.A., H.Y., C.W., T.H.; Writing –  
330 Original Draft, C.C. and E.J.R.; Writing – Review and Editing, C.C., E.J.R., and Y.Y.P.;



331 Supervision, E.J.R., G.T., and T.H.; Project administration, E.J.R.; Funding Acquisition,  
332 E.J.R., G.T., and T.H.

333

### 334 **DECLARATION OF INTERESTS**

335 The authors declare no competing interests.

336

### 337 **FIGURE LEGENDS**

338 **Figure 1 – Lipid droplets are present in early-stage somatic and germ cells. (A)**

339 Testis lipid droplets (LD) in  $w^{1118}$  animals visualized with neutral lipid dye BODIPY.

340 (A,A') Scale bar=50  $\mu\text{m}$ ; (A'',A''') scale bar=15  $\mu\text{m}$ . Asterisk indicates hub in all images.

341 Arrows point to LD; arrowheads point to spermatocytes in A,B. (B) Testis LD visualized

342 with BODIPY in newly-eclosed males from two wild-type genotypes. Scale bars: main

343 image=50  $\mu\text{m}$ ; inset image=10  $\mu\text{m}$ . (C) Testis LD from  $w^{1118}$  animals at different times

344 post-eclosion. Scale bars=50  $\mu\text{m}$ . (D) Testis LD visualized with LipidTox Red in animals

345 with somatic cell overexpression of GFP-LD ( $Tj-GAL4>UAS-GFP-LD$ ). GFP- and

346 LipidTox Red-positive punctae are somatic LD (D–D'' arrows); LipidTox punctae without

347 GFP indicate germline LD (D–D'' arrowheads). Scale bars=10  $\mu\text{m}$ . (E) Histogram

348 showing the spatial distribution of somatic cell LD; error bars represent standard error of

349 the mean (SEM). (F) Cumulative frequency distributions of somatic LD (blue line, data

350 reproduced from E),  $zfh-1$ -positive somatic cells ( $zfh-1^+$  cells, orange line), and  $Eya-$

351 positive somatic cells ( $Eya^+$  cells, grey line). (G) Testis LD visualized with LipidTox Red

352 in males with germline overexpression of GFP-LD ( $nos-GAL4>UAS-GFP-LD$ ). GFP- and

353 LipidTox Red-positive punctae indicate germline LD (arrows); LipidTox punctae without

354 GFP indicate non-germline LD (arrowheads). Scale bars=10  $\mu$ m. (H) Histogram  
355 representing the spatial distribution of LD within the germline; error bars represent SEM.  
356 (I) Histogram representing the spatial distribution of LD and GFP fluorescence (green  
357 line) (arbitrary units, a.u.) in a representative testis of a *bam-GFP* animal (panel J). (J)  
358 Testis LD in a *bam-GFP* animal; arrows point to LD and arrowheads point to  
359 spermatocytes. Scale bar=50  $\mu$ m. See also Supplemental Figure 1.

360

361 **Figure 2 – *bmm* regulates testis lipid droplets in a cell-autonomous manner.** (A)  
362 Testis lipid droplets (LD) indicated by LipidTox Red in *bmm-GFP* animals. Arrows point  
363 to LD in all images. Arrowheads point to spermatocytes. Scale bars=50  $\mu$ m. Asterisks  
364 indicate the hub in all images. (B) Quantification of nuclear GFP intensity in testes  
365 isolated from *bmm-GFP* animals (n=3). Germline stem cell (GSC), spermatogonia (SG),  
366 spermatocyte (SC). (C) Spatial distribution of LD (grey histogram) and GFP expression  
367 (green line) in testes from *bmm-GFP* animals as a function of distance from the hub  
368 (n=3). (D,E) LD near the apical region of the testis in *bmm<sup>rev</sup>* (D) or *bmm<sup>1</sup>* (E) animals.  
369 (F) LD further away from the apical tip in *bmm<sup>1</sup>* animals. (D–F) Scale bars=50  $\mu$ m. (G)  
370 Histogram representing testis LD size distribution in *bmm<sup>rev</sup>* (grey) and *bmm<sup>1</sup>* (orange).  
371 (H) Apical tip of the testes is at the left of the graph; individual dots represent a single  
372 LD and its relative position to the hub marked by an asterisk. Cumulative frequency  
373 distribution of the distance between LDs and the apical tip of the testes are drawn as  
374 solid lines. (I) Number of testis LD in *bmm<sup>rev</sup>* (grey) or *bmm<sup>1</sup>* (orange) in FLP-FRT  
375 clones 3 days post-clone induction; dots represent measurements from a single clone.

376 The number of cells in each cyst (CC) counted is indicated. See also Supplemental  
377 Figure 2.

378

379 **Figure 3 – A cell-autonomous role for *bmm* in regulating spermatogenesis.** Testes

380 isolated from *bmm<sup>rev</sup>* (A) and *bmm<sup>1</sup>* (A') animals raised at 29°C stained with phalloidin.

381 Scale bars=100 µm. (B) Testis size in *bmm<sup>1</sup>* and *bmm<sup>rev</sup>* animals raised at 29°C. (C)

382 Spermatid bundle number in *bmm<sup>1</sup>* and *bmm<sup>rev</sup>* testes from animals reared at 29°C.

383 (D,E) Representative images of *bmm<sup>rev</sup>* (D) or *bmm<sup>1</sup>* (E) testes stained with DAPI and

384 anti-Vasa antibody. Arrows indicate germline stem cells (GSC). Scale bar=50 µm. The

385 hub is marked by an asterisk in all images. (F) GSC number in *bmm<sup>1</sup>* and *bmm<sup>rev</sup>*

386 testes. (G) Proportion of GSCs that were either *bmm<sup>1</sup>* or *bmm<sup>rev</sup>* clones at 3 and 14

387 days post-clone induction. (H) Representative images of *bmm<sup>rev</sup>* (H) and *bmm<sup>1</sup>* (H')

388 testes carrying *bam-GFP*; data quantified in Figure S3J. Arrows indicate regions with

389 high Bam-GFP. Scale bars=50 µm. (I) Representative images of *bmm<sup>rev</sup>* (I) or *bmm<sup>1</sup>*

390 (I',I'') testes stained with anti-Vasa antibody. Arrows indicate Vasa-positive cysts in

391 *bmm<sup>1</sup>* testis. Panel I'' is magnified from the boxed region in I'. (I,I') Scale bars=100 µm;

392 (I'') scale bar=50 µm. (J) Maximum projection of *bmm<sup>rev</sup>* (J) or *bmm<sup>1</sup>* (J') testes stained

393 with anti-Boule antibody (green) and DAPI (blue). Scale bars=100 µm. Number of *bmm<sup>1</sup>*

394 and *bmm<sup>rev</sup>* spermatocyte clones (K) or post-meiotic clones (L) at 3 and 14 days post-

395 clone induction. See also Supplemental Figure 3.

396

397 **Figure 4 – Loss of *bmm* disrupts triglyceride homeostasis and leads to**

398 **spermatogenic defects.** (A) Hierarchical clustering of lipid species detected in *bmm<sup>rev</sup>*

399 and *bmm*<sup>1</sup> animals. (B) Histograms showing the proportion of species in each lipid class  
400 with different levels between *bmm*<sup>1</sup> and *bmm*<sup>rev</sup>. Numbers on histograms indicate the  
401 number of species with differences in abundance. (C) Volcano plot showing fold change  
402 in abundance of triglycerides (green; 97 species) and non-triglyceride lipids (grey; 186  
403 species) in our dataset. (D) Arrows indicate testis LD stained with LipidTox Red in  
404 *bmm*<sup>rev</sup> (D), *bmm*<sup>1</sup> (D'), or *mdy*<sup>QX25/k03902</sup>; *bmm*<sup>1</sup> (D'') animals. (E) Whole testes isolated  
405 from *bmm*<sup>rev</sup> (E), *bmm*<sup>1</sup> (E'), or *mdy*<sup>QX25/k03902</sup>; *bmm*<sup>1</sup> (E'') animals stained with anti-Vasa  
406 antibody (red) and DAPI (blue). Arrowheads indicate spermatid bundles. Scale  
407 bars=100 μm. (F) Testis size in *bmm*<sup>rev</sup>, *bmm*<sup>1</sup>, and *mdy*<sup>QX25/k03902</sup>; *bmm*<sup>1</sup> animals.  
408 Spermatid bundles (G) and number of germline stem cells (H) in *bmm*<sup>rev</sup>, *bmm*<sup>1</sup>, and  
409 *mdy*<sup>QX25/k03902</sup>; *bmm*<sup>1</sup> animals. (I) Testis size in animals with germline-specific *mdy*  
410 knockdown (*nos-GAL4>mdy RNAi; bmm*<sup>1</sup>) compared with controls (*nos-GAL4>+; bmm*<sup>1</sup>  
411 and *+>mdy RNAi; bmm*<sup>1</sup>). See also Supplemental Figure 4.  
412

413 **MATERIALS AND METHODS**

414

415 **Materials and Resource availability.** *Drosophila* strains and their source are listed in a  
416 Key Resources table. Further information and requests for resources and reagents  
417 should be directed to, and will be fulfilled by, lead contact Dr. Elizabeth J. Rideout  
418 ([elizabeth.rideout@ubc.ca](mailto:elizabeth.rideout@ubc.ca)).

419

420 **Data and Code availability.** All raw data and results of statistical tests reported in this  
421 paper are located in Supplementary files 1-4. This paper does not report original code.  
422 Any additional information required to reanalyze the data reported in this paper is  
423 available from the lead contact upon request.

424

425 **Fly husbandry.** Fly stocks were maintained at room temperature in 12:12 hour  
426 light:dark cycle. Unless otherwise indicated, all flies were raised at 25°C with a density  
427 of 50 larvae per 10 mL fly media. Because this project examines sperm development,  
428 we used male flies in all experiments. Fly media contained 20.5 g sucrose (SU10, Snow  
429 Cap), 70.9 g Dextrose (SUG8, Snow Cap), 48.5 g cornmeal (AO18006, Snow Cap),  
430 30.3 g baker's yeast (NB10, Snow Cap), 4.55 g agar (DR-820-25F, SciMart), 0.5 g  
431 calcium chloride dihydrate (CCL302.1, BioShop Canada), 0.5 g magnesium sulfate  
432 heptahydrate (MAG511.1, BioShop Canada), 4.9 mL propionic acids (P1386, Sigma-  
433 Aldrich), and 488 µL phosphoric acid (P5811, Sigma-Aldrich) per 1L of media. For diets  
434 with medium- or long-chain triglyceride, 4 g of coconut oil (medium chain triglyceride) or  
435 olive oil (long chain triglyceride) was added per 100 mL of media described above prior

436 to cooling. Males were collected and dissected within 24 hours of eclosion unless  
437 otherwise indicated. Fixations were performed at room temperature with 4%  
438 paraformaldehyde (CA11021-168, VWR) in PBS for 20 minutes on a rotating platform  
439 followed by washing in PBS twice before staining. Fly strains used in our study are  
440 listed in a Key Resources table.

441

442 ***Testis cell stage classification and measurements.*** Cells at an early stage of  
443 development (stem cells and early-stage somatic and germline cells) were located in  
444 the apical region of the testis, and were identified by their small and dense nuclei[120].  
445 GSC were defined as Vasa-positive cells in direct contact with the hub; proliferating  
446 GSC were identified as Vasa-positive cells in direct contact with the hub that were also  
447 phospho-H3 positive. Cells in the testis region occupied by primary spermatocytes were  
448 identified by their large cell size and decondensed chromosome staining occupying  
449 three nuclear domains[120]. Spermatid bundles were identified by their condensed and  
450 needle-shaped nuclei, which roughly corresponds to nuclei with protamine-based  
451 chromatin[121]. Testis size was measured by quantifying the length of a line drawn  
452 down the middle of a testis image; starting from the apical tip of the testis and ending  
453 where the testis meets the seminal vesicle.

454

455 ***FLP-FRT clone induction.*** Adult males were collected at 3-5 days post-eclosion and  
456 heat-shocked three times at 37°C with a 10 min rest period at room temperature  
457 between heat shocks. After heat-shock, the flies were incubated at room temperature  
458 until dissection.

459

460 **Immunohistochemistry.** Fixed samples were rinsed three times with blocking solution  
461 containing 0.2% bovine serum albumin (A4503, Sigma-Aldrich), 0.3% Triton-X in PBS,  
462 then blocked for 1 hr on a rotating platform at room temperature. During the incubation,  
463 the blocking solution was changed every 15 minutes. After blocking, the sample were  
464 resuspended in blocking solution with the appropriate concentration of primary antibody  
465 (see Key Resources table), and incubated overnight at 4°C. Samples were rinsed three  
466 times with blocking solution after removing primary antibody, and blocked for one hour  
467 on a rotating platform in blocking solution. Secondary antibody was applied in blocking  
468 solution and left on the rotating platform at room temperature for 40 min. The sample  
469 was rinsed with blocking solution three more times, and washed four times for 15 min  
470 per wash in blocking solution. Testis samples were resuspended in Vectashield  
471 mounting media with DAPI (H-1200-10, Vector Laboratory) or SlowFade Diamond  
472 mounting media (S36972, Thermo Fisher Scientific) prior to mounting.

473

474 **Lipid droplet staining.** Fixed testes were briefly permeabilized with 0.1% Triton-X in  
475 PBS for 5 min prior to applying phalloidin. For BODIPY staining, samples were  
476 suspended in PBS containing 10 µg/mL DAPI (2879083-5mg, PeproTech), 1:500  
477 BODIPY 495/503 (Thermo Fisher Scientific D3922), and 1:1000 phalloidin iFluor647  
478 (ab176759, Abcam) or 1:40 phalloidin TexasRed (T7471, Thermo Fisher Scientific). For  
479 staining with LipidTox Red, samples were suspended in PBS containing 10 µg/mL DAPI  
480 (2879083-5mg, PeproTech), 1:200 LipidTox Red (H34476, Thermo Fisher Scientific),  
481 and 1:1000 phalloidin iFluor647 (ab176759, Abcam). For staining free sterols, samples

482 were prepared as for BODIPY staining with 50 µg/mL filipin in place of BODIPY for 30  
483 min. Samples were incubated on a rotating platform for 40 minutes at room  
484 temperature. After incubation, samples were washed twice with PBS, then resuspended  
485 in SlowFade Diamond mounting media (Thermo Fisher Scientific S36972) prior to  
486 mounting.

487

488 **Image acquisition and processing.** All images were acquired on a Leica SP5 confocal  
489 microscope system with 20X or 40X objectives and quantified with Fiji image analysis  
490 software[122].

491

492 ***Drosophila lipidomics.*** *Drosophila* extracts were prepared following the previously  
493 reported protocol[123]. Briefly, 10 *Drosophila* males (~10 mg) were weighed, 300 µL of  
494 ice-cold methanol/water mixture (9:1, v:v) was added to these males, and the samples  
495 were homogenized with glass beads using a bead beater (mini-beadbeater-16,  
496 BioSpec, Bartlesville, Ok, USA). Sample weight was used for sample normalization. Fly  
497 lysate was kept at -20°C for 4 hours for protein precipitation. Then, 900 µL of methyl  
498 tert-butyl ether was added and the solution was shaken for 5 min to extract lipids. To  
499 induce phase separation 285 µL of water was added, followed by centrifugation. The  
500 upper layer was separated, dried, and reconstituted in isopropanol/acetonitrile (1:1, v:v)  
501 for liquid chromatography-mass spectrometry (LC-MS) analysis. The volume of  
502 reconstitution solution was proportional to sample weight for normalization. Quality  
503 control (QC) samples were prepared by pooling 20 µL aliquot from each sample. The



504 method blank sample was prepared using an identical workflow but without adding  
505 *Drosophila*.

506 *Drosophila* extracts were analyzed on an UHR-QqTOF (Ultra-High Resolution  
507 Qq-Time-Of-Flight) mass spectrometry Impact II (Bruker Daltonics, Bremen, Germany)  
508 interfaced with an Agilent 1290 Infinity II LC Systems (Agilent Technologies, Santa  
509 Clara, CA, USA). LC separation was performed using a Waters reversed-phase (RP)  
510 UPLC Acquity BEH C18 Column (1.7  $\mu\text{m}$ , 1.0 mm  $\times$  100 mm, 130  $\text{\AA}$ ) (Milford, MA, USA)  
511 maintained at 30°C. For positive ion mode, the mobile phase A was 60% acetonitrile in  
512 water and the mobile phase B was 90% isopropanol in acetonitrile, both containing 5  
513 mM ammonium formate (pH = 4.8, adjusted by formic acid). For negative ion mode, the  
514 mobile phase A was 60% acetonitrile in water and the mobile phase B was 90%  
515 isopropanol in acetonitrile, both containing 5 mM  $\text{NH}_4\text{FA}$  (pH = 9.8, adjusted by  
516 ammonium hydroxide). The LC gradient for positive and negative ion modes was set as  
517 follows: 0 min, 5% B; 8 min, 40% B; 14 min, 70% B; 20 min, 95% B; 23 min, 95% B; 24  
518 min, 5% B; 33 min, 5% B. The flow rate was 0.1 mL/min. The injection volume was  
519 optimized to 2  $\mu\text{L}$  in positive mode and 5  $\mu\text{L}$  in negative mode using QC sample. The  
520 ESI source conditions were set as follows: dry gas temperature, 220 °C; dry gas flow, 7  
521 L/min; nebulizer gas pressure, 1.6 bar; capillary voltage, 4500 V for positive mode and  
522 3000 V for negative mode. The MS1 analysis was conducted using following  
523 parameters: mass range, 70-1000 m/z; spectrum type: centroid, calculated using  
524 maximum intensity; absolute intensity threshold: 250. Data-dependent MS/MS analysis  
525 parameters: collision energy: 16-30 eV; cycle time, 3 s; spectra rate: 4 Hz when  
526 intensity <  $10^4$  and 12 Hz when intensity >  $10^5$ , linearly increased from  $10^4$  to  $10^5$ .

527 External calibration was applied using sodium formate to ensure the m/z accuracy  
528 before sample analysis.

529 The raw LC-MS data were processed using MS-DIAL (ver. 4.38)[124]. The  
530 detailed MS-DIAL parameters are: MS1 tolerance, 0.01 Da; MS/MS tolerance, 0.05;  
531 mass slice width, 0.05 Da; smoothing method, linear weighted moving average;  
532 smoothing level, 3 scans; minimum peak width, 5 scans. Lipid features with high  
533 quantitative confidence were selected by the following criteria: retention time was within  
534 the gradient elution time (< 23 min); average intensity in QC samples is larger than 5-  
535 fold of the intensity in method blank sample. Lipid identification was performed by  
536 matching experimental precursor m/z, isotopic ratio and MS/MS spectrum against the  
537 LipidBlast libraries embedded in MS-DIAL. To improve the quantification accuracy, the  
538 measured MS signal intensities were corrected using serial diluted QC samples  
539 following the reported workflow[125].

540

541 **Quantification and statistical analysis.** All microscopy images were quantified using  
542 Fiji software[122]. For lipid droplet counts, a single optical slice through the middle of  
543 the testis containing the hub was used with the exception of FLP-FRT experiment where  
544 all lipid droplets within a GFP-negative cyst were counted (Figure 2I). All statistical  
545 analyses were done using R (obtained from <https://cran.r-project.org>). With exception of  
546 data concerning spatial distribution, and lipidomic data, Shapiro-Wilk test (via  
547 *shapiro.test* in base R) was used to assess normality of distribution prior to testing for  
548 significance. Kruskal-Wallis rank sum test (from the R package *coin*) and Dunn's test  
549 (from the R package *dunn.test*) were used in place of Welch two-sample t-test and

550 Tukey's multiple comparison test when the assumption of normality was not met. For  
551 testing differences in variance between two populations, F-test (via *var.test* in base R)  
552 was used. For testing differences in spatial distribution, two-sample Kolmogorov-  
553 Smirnov test (via *ks.test* in base R) was used. All *p*-values are indicated in figures;  
554 extremely small *p*-values are listed as  $p < 2.2 \times 10^{-16}$ .  
555

556 **RESOURCE TABLE**

| REAGENT or RESOURCE                                                                            | SOURCE                                            | RESOURCE # |
|------------------------------------------------------------------------------------------------|---------------------------------------------------|------------|
| <b>Antibodies</b>                                                                              |                                                   |            |
| Anti-Vasa (1:200)                                                                              | Gift from Dr. R. Lehman,<br>MIT                   |            |
| Anti-Eya (1:50)                                                                                | Developmental Studies<br>Hybridoma Bank<br>(DSHB) | eya10H6    |
| Anti-zfh1 (1:1000)                                                                             | Gift from Dr. J. Skeath,<br>WUSTL                 |            |
| Anti-boule (1:1000)                                                                            | Gift from Dr. S.<br>Wasserman, UCSD               |            |
| Anti-phospho-histone H3 (1:1000)                                                               | Millipore Sigma                                   | 05-1354    |
| <b>Experimental models: <i>Drosophila melanogaster</i></b>                                     |                                                   |            |
| <i>w<sup>1118</sup></i>                                                                        | Bloomington <i>Drosophila</i><br>stock center     | 3605       |
| <i>CantonS</i>                                                                                 | Bloomington <i>Drosophila</i><br>stock center     | 64349      |
| <i>OregonR</i>                                                                                 | Bloomington <i>Drosophila</i><br>stock center     | 25211      |
| <i>bmm<sup>f</sup></i>                                                                         | Gift from Dr. R. Kühnlein                         |            |
| <i>bmm<sup>rev</sup></i>                                                                       | Gift from Dr. R. Kühnlein                         |            |
| <i>mdy</i> [Qx25], <i>cn</i> [1], <i>bw</i> [1]/CyO, <i>I(2)DTS513</i> [1]                     | Bloomington <i>Drosophila</i><br>stock center     | 5095       |
| <i>y</i> [1], <i>w</i> [67c23]; <i>P{lacW}</i> ; <i>Cse1</i> [k03802], <i>mdy</i> [k03902]/CyO | Bloomington <i>Drosophila</i><br>stock center     | 10536      |
| <i>w</i> [1118]; <i>P{GD1749}</i> v6367 ( <i>UAS-mdy-RNAi</i> )                                | Vienna <i>Drosophila</i><br>resource center       | 6367       |

| REAGENT or RESOURCE            | SOURCE                                                                            | RESOURCE # |
|--------------------------------|-----------------------------------------------------------------------------------|------------|
| <i>nos-GAL4::VP16</i>          | Bloomington <i>Drosophila</i><br>stock center                                     | 7303       |
| <i>Tj-GAL4</i>                 | Gift from Dr. D. Godt,<br>University of Toronto                                   |            |
| <i>c587-GAL4</i>               | Bloomington <i>Drosophila</i><br>stock center                                     | 67747      |
| Bam-GFP                        | 40                                                                                |            |
| <i>bmm-GFP</i>                 | Gift from Dr. K. Kamel <sup>57</sup>                                              |            |
| <i>GFP-LD</i>                  | Gift from Dr. M. Welte <sup>36</sup>                                              |            |
| <i>P{neoFRT}82B, bmm[1]</i>    | This study                                                                        |            |
| <i>P{neoFRT}82B, bmm[rev]</i>  | This study                                                                        |            |
| <i>bam-GFP, bmm[1]</i>         | This study                                                                        |            |
| <i>bam-GFP, bmm[rev]</i>       | This study                                                                        |            |
| <b>Software and algorithms</b> |                                                                                   |            |
| Fiji                           | <a href="https://imagej.net/software/fiji/">https://imagej.net/software/fiji/</a> |            |
| R                              | <a href="https://cran.r-project.org">https://cran.r-project.org</a>               |            |

557

558 **SUPPLEMENTAL TABLE AND FILES**

559 **Supplemental table 1** – Table showing identified lipid species from untargeted

560 lipidomic analysis.

561 **Supplementary file 1** – Raw data and statistical outputs from Figure 1.

562 **Supplementary file 2** – Raw data and statistical outputs from Figure 2 and

563 Supplemental figure 2.

564 **Supplementary file 3** – Raw data and statistical outputs from Figure 3 and  
565 Supplemental figure 3.

566 **Supplementary file 4** – Raw data and statistical outputs from Figure 4 and  
567 Supplemental figure 4.

568

## 569 **SUPPLEMENTAL FIGURE LEGENDS**

570 **Supplemental Figure 1 related to Figure 1 – Cholesterol is absent from testis lipid**  
571 **droplets.** (A) Testes stained with BODIPY (A) to detect neutral lipids and Filipin III (A')  
572 to detect free cholesterol. Scale bars=50  $\mu\text{m}$ .

573

574 **Supplemental Figure 2 related to Figure 2 – *bmm* mRNA levels during**  
575 **spermatogenesis in germline and somatic lineages.** (A) Pseudotime trajectory of  
576 germline (black line) based on single-cell RNA sequencing data<sup>62</sup>. Individual cells are  
577 labeled according to the annotation within the data set. (B) Rolling average of  
578 normalized *bmm* transcript counts in the germline along the trajectory shown in panel A  
579 are plotted as a black line on the upper panel. Composition of cell types mapped on to  
580 the trajectory at each time point is shown at the lower half of panel B. (C) Pseudotime  
581 trajectory of the somatic cells (black line) based on publicly available single-cell RNA  
582 sequencing data<sup>62</sup>. Individual cells are labeled according to the annotation within the  
583 data set. (D) Rolling average of normalized *bmm* transcript counts in somatic cells  
584 plotted as a black line along the trajectory shown in C (upper panel). Composition of cell  
585 types mapped on to the trajectory at each time point (lower panel). (E-H)  
586 Representative images of *bmm*<sup>rev</sup> (E and F) and *bmm*<sup>1</sup> (G and H) testes with somatic

587 over-expression of *GFP-LD* (*Tj-GAL4>UAS-GFP-LD*). Panel F and H contain magnified  
588 images of the area indicated by the boxes in panel E and G, respectively. In *bmm<sup>rev</sup>*  
589 testes, LD were restricted to a region near the apical tip (E) of the testis in both somatic  
590 (F–F''' arrows) and germline cells (F–F''' arrowheads). In *bmm<sup>1</sup>* testes, LD were present  
591 in both somatic (G–H arrows) and germline cells (G–H arrowheads), near the apical tip  
592 of the testis in a region corresponding to early-stage germ cells and in the region  
593 corresponding to spermatocytes. (E,G) Scale bars=50  $\mu\text{m}$ ; (F,H) scale bars=20  $\mu\text{m}$ .

594

595 **Supplemental Figure 3 related to Figure 3 – Additional characterization of testis**

596 **development and spermatogenesis in animals lacking *bmm*.** (A) Testis size was

597 smaller in *bmm<sup>1</sup>* mutant animals compared with *bmm<sup>rev</sup>* controls at <24 hr post-eclosion

598 when raised at 25°C (A; Welch two-sample t-test). (B) The number of spermatid bundles

599 was significantly lower in *bmm<sup>1</sup>* mutant animals compared with *bmm<sup>rev</sup>* controls at <24

600 hr post-eclosion when raised at 25°C (Kruskal-Wallis rank sum test). (C) Testis size was

601 significantly smaller in *bmm<sup>1</sup>* mutant males compared with *bmm<sup>rev</sup>* control males at 14-

602 days post-eclosion (Welch two-sample t-test). (D) While the median number of

603 spermatid bundles was not significantly different between *bmm<sup>1</sup>* mutant males and

604 *bmm<sup>rev</sup>* control males at 14 days post-eclosion (Welch two-sample t-test), 8/27 *bmm<sup>1</sup>*

605 testis had no spermatid bundles, a phenotype absent in age-matched *bmm<sup>rev</sup>* males

606 (0/22) ( $p=0.0163$ , Pearson's Chi-squared test), suggesting a subtle defect is present.

607 (E) Food supplemented with 4% medium chain triglyceride (MCT), but not long chain

608 triglyceride (LCT), significantly increased testis length in *bmm<sup>1</sup>* animals but had no effect

609 on this phenotype in *bmm<sup>rev</sup>* control animals (one-way ANOVA with Tukey multiple

610 comparison test). (F) Food supplemented with 4% medium chain triglyceride  
611 significantly increased the number of spermatid bundles in *bmm*<sup>1</sup> testes but had no  
612 effect on this phenotype in *bmm*<sup>rev</sup> control animals (one-way ANOVA with Tukey  
613 multiple comparison test). (G) Representative images of *bmm*<sup>rev</sup> (G–G') or *bmm*<sup>1</sup> (G''–  
614 G''') testes stained for Fas3 (G and G'') and Vas (G' and G'''). Scale bars=25 µm. (H)  
615 Quantification of hub area in *bmm*<sup>rev</sup> or *bmm*<sup>1</sup> testes showed a significantly larger hub  
616 size in *bmm*<sup>1</sup> testes (Welch two-sample t-test). (I) The number of germline stem cells  
617 (GSC) undergoing mitosis (phospho-histone H3<sup>+</sup> GSC/total GSC) was not significantly  
618 different between *bmm*<sup>1</sup> and *bmm*<sup>rev</sup> testes (Kruskal-Wallis rank sum test). (J) The  
619 distance between the hub and the first Bam-GFP positive cyst (Figure 3H) was  
620 significantly higher in *bmm*<sup>1</sup> testes than in *bmm*<sup>rev</sup> testes (Welch two-sample t-test). (K)  
621 All *bmm*<sup>rev</sup> testes and most *bmm*<sup>1</sup> testes contained spermatids when raised at 25°C;  
622 however, the most advanced stage of spermatogenesis observed in the majority of  
623 *bmm*<sup>1</sup> testes isolated from animals reared at 29°C was the spermatocyte stage. (L)  
624 Testes isolated from *bmm*<sup>1</sup> animals showed a significantly smaller Boule-positive area  
625 than control testes (Welch two-sample t-test). (M) Testes isolated from *bmm*<sup>1</sup> animals  
626 contain fewer individualization complexes than *bmm*<sup>rev</sup> control testes (Kruskal-Wallis  
627 rank sum test). (N) Fewer waste bags were present in testes isolated from *bmm*<sup>1</sup>  
628 animals compared with *bmm*<sup>rev</sup> control testes (Kruskal-Wallis rank sum test).

629

630 **Supplemental Figure 4 related to Figure 4 – Lipidomic analysis of animals lacking**

631 ***bmm***. (A) Higher fold-changes of triglycerides in *bmm*<sup>1</sup> animals were associated with  
632 less saturation in the acyl-groups (Kendall's rank correlation test). (B) Higher fold-



633 changes of triglycerides in *bmm*<sup>1</sup> animals were associated with higher number of  
634 carbons in the acyl-groups (Kendall's rank correlation test). Each dot represents a single  
635 triglyceride species for panel B and C. (C) Volcano plot of identified lipids;  
636 monoglycerides shown in blue and diglycerides shown in orange. Many monoglycerides  
637 and diglycerides show increase in fold-change in *bmm*<sup>1</sup> males. (D) The number of  
638 carbon and the degree of saturation of monoglycerides (MAG) and diglycerides (DAG)  
639 with significant changes in abundance between *bmm*<sup>1</sup> and *bmm*<sup>rev</sup> males. (E) Volcano  
640 plot of identified lipids; fatty acids shown in magenta and acyl-carnitine shown in green.  
641 Many fatty acids show an increase in fold-change while many acyl-carnitines show a  
642 decrease in fold-change in *bmm*<sup>1</sup> males. (F) The number of carbon and the degree of  
643 saturation of fatty acids (FA) and acyl-carnitines (ACar) with significant changes in  
644 abundance between *bmm*<sup>1</sup> and *bmm*<sup>rev</sup> males. (G) Volcano plot of identified lipids;  
645 membrane lipids shown in yellow. (H) The number of carbon and the degree of  
646 saturation of membrane lipids with significant changes in abundance between *bmm*<sup>1</sup>  
647 and *bmm*<sup>rev</sup> males. For panel G and H, PC: phosphatidylcholine; PE:  
648 phosphatidylethanolamine; PI: phosphatidylinositol; LPC: lysophosphatidylcholine; LPE:  
649 lysophosphatidylethanolamine; SM: sphingomyelin; PG: phosphatidylglycerol. (I) Loss  
650 of *mdy* function rescued the elevated number of LD in *bmm*<sup>1</sup> testes to control levels  
651 (one-way ANOVA with Tukey multiple comparison test). (J) Germline-specific loss of  
652 *mdy* in *bmm*<sup>1</sup> animals did not reduce GSC numbers, but the variance in GSC number  
653 was significantly rescued (*nos-GAL4*>+; *bmm*<sup>1</sup> vs *nos-GAL4*>*mdy* RNAi; *bmm*<sup>1</sup>:  $p=4.5 \times$   
654  $10^{-5}$ ; +>*mdy* RNAi; *bmm*<sup>1</sup> vs *nos-GAL4*>*mdy* RNAi; *bmm*<sup>1</sup>:  $p=0.0082$  by F-test).

655  
656

657 **REFERENCES**

658

- 659 1. Brill JA, Yildirim S, Fabian L. Phosphoinositide signaling in sperm development.  
660 *Semin Cell Dev Biol.* 2016;59: 2–9. doi:10.1016/j.semcd.2016.06.010
- 661 2. Keber R, Rozman D, Horvat S. Sterols in spermatogenesis and sperm maturation. *J*  
662 *Lipid Res.* 2013;54: 20–33. doi:10.1194/jlr.R032326
- 663 3. Rato L, Alves MG, Socorro S, Duarte AI, Cavaco JE, Oliveira PF. Metabolic  
664 regulation is important for spermatogenesis. *Nat Rev Urol.* 2012;9: 330–338.  
665 doi:10.1038/nrurol.2012.77
- 666 4. Wang C, Huang X. Lipid metabolism and Drosophila sperm development. *Sci China*  
667 *Life Sci.* 2012;55: 35–40. doi:10.1007/s11427-012-4274-2
- 668 5. de Cuevas M, Matunis EL. The stem cell niche: lessons from the Drosophila testis.  
669 *Dev Camb Engl.* 2011;138: 2861–2869. doi:10.1242/dev.056242
- 670 6. Demarco RS, Eikenes ÅH, Haglund K, Jones DL. Investigating Spermatogenesis in  
671 *Drosophila melanogaster.* *Methods San Diego Calif.* 2014;68: 218–227.  
672 doi:10.1016/j.ymeth.2014.04.020
- 673 7. Fabian L, Brill JA. Drosophila spermiogenesis: Big things come from little packages.  
674 *Spermatogenesis.* 2012;2: 197–212. doi:10.4161/spmg.21798
- 675 8. Brill JA, Hime GR, Scharer-Schuksz M, Fuller MT. A phospholipid kinase regulates  
676 actin organization and intercellular bridge formation during germline cytokinesis.  
677 *Development.* 2000;127: 3855.
- 678 9. Giansanti MG, Bonaccorsi S, Kurek R, Farkas RM, Dimitri P, Fuller MT, et al. The  
679 Class I P1TP Giotto Is Required for Drosophila Cytokinesis. *Curr Biol.* 2006;16:  
680 195–201. doi:10.1016/j.cub.2005.12.011
- 681 10. Wong R, Hadjiyanni I, Wei H-C, Polevoy G, McBride R, Sem K-P, et al. PIP2  
682 Hydrolysis and Calcium Release Are Required for Cytokinesis in Drosophila  
683 Spermatocytes. *Curr Biol.* 2005;15: 1401–1406. doi:10.1016/j.cub.2005.06.060
- 684 11. Wong R, Fabian L, Forer A, Brill JA. Phospholipase C and myosin light chain  
685 kinase inhibition define a common step in actin regulation during cytokinesis. *BMC*  
686 *Cell Biol.* 2007;8: 15. doi:10.1186/1471-2121-8-15
- 687 12. Amoyel M, Hillion K-H, Margolis SR, Bach EA. Somatic stem cell differentiation is  
688 regulated by PI3K/Tor signaling in response to local cues. *Dev Camb Engl.*  
689 2016;143: 3914. doi:10.1242/dev.139782
- 690 13. Fairchild MJ, Islam F, Tanentzapf G. Identification of genetic networks that act in  
691 the somatic cells of the testis to mediate the developmental program of

- 692 spermatogenesis. *PLOS Genet.* 2017;13: e1007026.  
693 doi:10.1371/journal.pgen.1007026
- 694 14. Inaba M, Venkei ZG, Yamashita YM. The polarity protein Baz forms a platform for  
695 the centrosome orientation during asymmetric stem cell division in the *Drosophila*  
696 male germline. *eLife.* 2015;4: e04960. doi:10.7554/eLife.04960
- 697 15. Krahn MP, Klopfenstein DR, Fischer N, Wodarz A. Membrane Targeting of  
698 Bazooka/PAR-3 Is Mediated by Direct Binding to Phosphoinositide Lipids. *Curr*  
699 *Biol.* 2010;20: 636–642. doi:10.1016/j.cub.2010.01.065
- 700 16. Papagiannouli F, Berry CW, Fuller MT. The Dlg Module and Clathrin-Mediated  
701 Endocytosis Regulate EGFR Signaling and Cyst Cell-Germline Coordination in  
702 the *Drosophila* Testis. *Stem Cell Rep.* 2019;12: 1024–1040.  
703 doi:10.1016/j.stemcr.2019.03.008
- 704 17. Ueishi S, Shimizu H, Inoue YH. Male Germline Stem Cell Division and  
705 Spermatocyte Growth Require Insulin Signaling in *Drosophila*. *Cell Struct Funct.*  
706 2009;34: 61–69. doi:10.1247/csf.08042
- 707 18. Phan VH, Herr DR, Panton D, Fyrst H, Saba JD, Harris GL. Disruption of  
708 Sphingolipid Metabolism Elicits Apoptosis-Associated Reproductive Defects in  
709 *Drosophila*. *Dev Biol.* 2007;309: 329–341. doi:10.1016/j.ydbio.2007.07.021
- 710 19. Steinhauer J, Gijón MA, Riekhof WR, Voelker DR, Murphy RC, Treisman JE.  
711 *Drosophila* Lysophospholipid Acyltransferases Are Specifically Required for Germ  
712 Cell Development. *Mol Biol Cell.* 2009;20: 5224–5235. doi:10.1091/mbc.e09-05-  
713 0382
- 714 20. Szafer-Glusman E, Giansanti MG, Nishihama R, Bolival B, Pringle J, Gatti M, et al.  
715 A Role for Very-Long-Chain Fatty Acids in Furrow Ingression during Cytokinesis in  
716 *Drosophila* Spermatocytes. *Curr Biol.* 2008;18: 1426–1431.  
717 doi:10.1016/j.cub.2008.08.061
- 718 21. Ben-David G, Miller E, Steinhauer J. *Drosophila* spermatid individualization is  
719 sensitive to temperature and fatty acid metabolism. *Spermatogenesis.* 2015;5.  
720 doi:10.1080/21565562.2015.1006089
- 721 22. Jung A, Hollmann M, Schafer MA. The fatty acid elongase NOA is necessary for  
722 viability and has a somatic role in *Drosophila* sperm development. *J Cell Sci.*  
723 2007;120: 2924–2934. doi:10.1242/jcs.006551
- 724 23. Rabionet M, Bayerle A, Jennemann R, Heid H, Fuchser J, Marsching C, et al. Male  
725 meiotic cytokinesis requires ceramide synthase 3-dependent sphingolipids with  
726 unique membrane anchors. *Hum Mol Genet.* 2015;24: 4792–4808.  
727 doi:10.1093/hmg/ddv204

- 728 24. Santiago Valtierra FX, Peñalva DA, Luquez JM, Furland NE, Vásquez C, Reyes  
729 JG, et al. Elovl4 and Fa2h expression during rat spermatogenesis: a link to the  
730 very-long-chain PUFAs typical of germ cell sphingolipids. *J Lipid Res.* 2018;59:  
731 1175–1189. doi:10.1194/jlr.M081885
- 732 25. Zadavec D, Tvrdik P, Guillou H, Haslam R, Kobayashi T, Napier JA, et al. ELOVL2  
733 controls the level of n-6 28:5 and 30:5 fatty acids in testis, a prerequisite for male  
734 fertility and sperm maturation in mice. *J Lipid Res.* 2011;52: 245–255.  
735 doi:10.1194/jlr.M011346
- 736 26. Walther TC, Farese RV. Lipid Droplets and Cellular Lipid Metabolism. *Annu Rev*  
737 *Biochem.* 2012;81: 687–714. doi:10.1146/annurev-biochem-061009-102430
- 738 27. Wat LW, Chao C, Bartlett R, Buchanan JL, Millington JW, Chih HJ, et al. A role for  
739 triglyceride lipase brummer in the regulation of sex differences in *Drosophila* fat  
740 storage and breakdown. Hassan BA, editor. *PLOS Biol.* 2020;18: e3000595.  
741 doi:10.1371/journal.pbio.3000595
- 742 28. Thiele C, Spandl J. Cell biology of lipid droplets. *Curr Opin Cell Biol.* 2008;20: 378–  
743 385. doi:10.1016/j.ceb.2008.05.009
- 744 29. Bosma M. Lipid droplet dynamics in skeletal muscle. *Exp Cell Res.* 2016;340: 180–  
745 186. doi:10.1016/j.yexcr.2015.10.023
- 746 30. Grönke S, Müller G, Hirsch J, Fellert S, Andreou A, Haase T, et al. Dual Lipolytic  
747 Control of Body Fat Storage and Mobilization in *Drosophila*. *PLOS Biol.* 2007;5:  
748 e137. doi:10.1371/journal.pbio.0050137
- 749 31. Rambold AS, Cohen S, Lippincott-Schwartz J. Fatty Acid Trafficking in Starved  
750 Cells: Regulation by Lipid Droplet Lipolysis, Autophagy, and Mitochondrial Fusion  
751 Dynamics. *Dev Cell.* 2015;32: 678–692. doi:10.1016/j.devcel.2015.01.029
- 752 32. Dichlberger A, Schlager S, Maaninka K, Schneider WJ, Kovanen PT. Adipose  
753 triglyceride lipase regulates eicosanoid production in activated human mast cells.  
754 *J Lipid Res.* 2014;55: 2471–2478. doi:10.1194/jlr.M048553
- 755 33. Mitsche MA, Hobbs HH, Cohen JC. Patatin-like phospholipase domain-containing  
756 protein 3 promotes transfers of essential fatty acids from triglycerides to  
757 phospholipids in hepatic lipid droplets. *J Biol Chem.* 2018;293: 6958–6968.  
758 doi:10.1074/jbc.RA118.002333
- 759 34. Rajakumari S, Rajasekharan R, Daum G. Triacylglycerol lipolysis is linked to  
760 sphingolipid and phospholipid metabolism of the yeast *Saccharomyces*  
761 *cerevisiae*☆. *Biochim Biophys Acta BBA - Mol Cell Biol Lipids.* 2010;1801: 1314–  
762 1322. doi:10.1016/j.bbalip.2010.08.004
- 763 35. Schlager S, Goeritzer M, Jandl K, Frei R, Vujic N, Kolb D, et al. Adipose triglyceride  
764 lipase acts on neutrophil lipid droplets to regulate substrate availability for lipid

- 765 mediator synthesis. *J Leukoc Biol.* 2015;98: 837–850. doi:10.1189/jlb.3A0515-  
766 206R
- 767 36. Zanghellini J, Natter K, Jungreuthmayer C, Thalhammer A, Kurat CF, Gogg-  
768 Fassolter G, et al. Quantitative modeling of triacylglycerol homeostasis in yeast -  
769 metabolic requirement for lipolysis to promote membrane lipid synthesis and  
770 cellular growth: Triacylglycerol mobilization in yeast. *FEBS J.* 2008;275: 5552–  
771 5563. doi:10.1111/j.1742-4658.2008.06681.x
- 772 37. Bailey AP, Koster G, Guillermier C, Hirst EMA, MacRae JI, Lechene CP, et al.  
773 Antioxidant Role for Lipid Droplets in a Stem Cell Niche of *Drosophila*. *Cell.*  
774 2015;163: 340–353. doi:10.1016/j.cell.2015.09.020
- 775 38. Liu L, MacKenzie KR, Putluri N, Maletić-Savatić M, Bellen HJ. The Glia-Neuron  
776 Lactate Shuttle and Elevated ROS Promote Lipid Synthesis in Neurons and Lipid  
777 Droplet Accumulation in Glia via APOE/D. *Cell Metab.* 2017;26: 719-737.e6.  
778 doi:10.1016/j.cmet.2017.08.024
- 779 39. Nguyen TB, Louie SM, Daniele JR, Tran Q, Dillin A, Zoncu R, et al. DGAT1-  
780 Dependent Lipid Droplet Biogenesis Protects Mitochondrial Function during  
781 Starvation-Induced Autophagy. *Dev Cell.* 2017;42: 9-21.e5.  
782 doi:10.1016/j.devcel.2017.06.003
- 783 40. Henne M. And three's a party: lysosomes, lipid droplets, and the ER in lipid  
784 trafficking and cell homeostasis. *Curr Opin Cell Biol.* 2019;59: 40–49.  
785 doi:10.1016/j.ceb.2019.02.011
- 786 41. Welte MA. Expanding Roles for Lipid Droplets. *Curr Biol.* 2015;25: R470–R481.  
787 doi:10.1016/j.cub.2015.04.004
- 788 42. Casado ME, Pastor O, Mariscal P, Canfrán-Duque A, Martínez-Botas J, Kraemer  
789 FB, et al. Hormone-sensitive lipase deficiency disturbs the fatty acid composition  
790 of mouse testis. *Prostaglandins Leukot Essent Fatty Acids.* 2013;88: 227–233.  
791 doi:10.1016/j.plefa.2012.12.005
- 792 43. El-Shehawi AM, El-Shazly S, Ahmed M, Alkafafy M, Sayed S, Farouk S, et al.  
793 Transcriptome Analysis of Testis from HFD-Induced Obese Rats (*Rattus*  
794 *norvigicus*) Indicated Predisposition for Male Infertility. *Int J Mol Sci.* 2020;21:  
795 6493. doi:10.3390/ijms21186493
- 796 44. Wang W, Wei S, Li L, Su X, Du C, Li F, et al. Proteomic analysis of murine testes  
797 lipid droplets. *Sci Rep.* 2015;5: 12070. doi:10.1038/srep12070
- 798 45. Bajpai M, Gupta G, Setty BS. Changes in carbohydrate metabolism of testicular  
799 germ cells during meiosis in the rat. *Eur J Endocrinol.* 1998;138: 322–327.

- 800 46. Kerr JB, Kretser DMD. CYCLIC VARIATIONS IN SERTOLI CELL LIPID CONTENT  
801 THROUGHOUT THE SPERMATOGENIC CYCLE IN THE RAT. *Reproduction*.  
802 1975;43: 1–8. doi:10.1530/jrf.0.0430001
- 803 47. Mori H, Christensen AK. Morphometric analysis of Leydig cells in the normal rat  
804 testis. *J Cell Biol*. 1980;84: 340–354. doi:10.1083/jcb.84.2.340
- 805 48. Paniagua R, Rodríguez MC, Nistal M, Fraile B, Amat P. Changes in the lipid  
806 inclusion/Sertoli cell cytoplasm area ratio during the cycle of the human  
807 seminiferous epithelium. *Reproduction*. 1987;80: 335–341.  
808 doi:10.1530/jrf.0.0800335
- 809 49. Demarco RS, Uyemura BS, D’Alterio C, Jones DL. Mitochondrial fusion regulates  
810 lipid homeostasis and stem cell maintenance in the *Drosophila* testis. *Nat Cell*  
811 *Biol*. 2019;21: 710–720. doi:10.1038/s41556-019-0332-3
- 812 50. Chen M, Wang H, Li X, Li N, Xu G, Meng Q. PLIN1 deficiency affects testicular  
813 gene expression at the meiotic stage in the first wave of spermatogenesis. *Gene*.  
814 2014;543: 212–219. doi:10.1016/j.gene.2014.04.021
- 815 51. Hermo L, Chung S, Gregory M, Smith CE, Wang SP, El-Alfy M, et al. Alterations in  
816 the testis of hormone sensitive lipase-deficient mice is associated with decreased  
817 sperm counts, sperm motility, and fertility. *Mol Reprod Dev*. 2008;75: 565–577.  
818 doi:10.1002/mrd.20800
- 819 52. Masaki H, Kim N, Nakamura H, Kumasawa K, Kamata E, Hirano K, et al. Long-  
820 chain fatty acid triglyceride (TG) metabolism disorder impairs male fertility: a study  
821 using adipose triglyceride lipase deficient mice. *MHR Basic Sci Reprod Med*.  
822 2017;23: 452–460. doi:10.1093/molehr/gax031
- 823 53. Freeman DA, Ascoli M. Studies on the source of cholesterol used for steroid  
824 biosynthesis in cultured Leydig tumor cells. *J Biol Chem*. 1982;257: 14231–14238.
- 825 54. Wang F, Chen Z, Ren X, Tian Y, Wang F, Liu C, et al. Hormone-sensitive lipase  
826 deficiency alters gene expression and cholesterol content of mouse testis.  
827 *Reproduction*. 2017;153: 175–185. doi:10.1530/REP-16-0484
- 828 55. de Cuevas M, Matunis EL. The stem cell niche: lessons from the *Drosophila* testis.  
829 *Development*. 2011;138: 2861–2869. doi:10.1242/dev.056242
- 830 56. Walther TC, Chung J, Jr RVF. Lipid Droplet Biogenesis. *Annu Rev Cell Dev Biol*.  
831 2017;33: 491–510. doi:10.1146/annurev-cellbio-100616-060608
- 832 57. Boyle M, DiNardo S. Specification, migration and assembly of the somatic cells of  
833 the *Drosophila* gonad. *Development*. 1995;121: 1815–1825.  
834 doi:10.1242/dev.121.6.1815

- 835 58. Yu YV, Li Z, Rizzo NP, Einstein J, Welte MA. Targeting the motor regulator Klar to  
836 lipid droplets. *BMC Cell Biol.* 2011;12: 9. doi:10.1186/1471-2121-12-9
- 837 59. Leatherman JL, DiNardo S. Zfh-1 Controls Somatic Stem Cell Self-Renewal in the  
838 *Drosophila* Testis and Nonautonomously Influences Germline Stem Cell Self-  
839 Renewal. *Cell Stem Cell.* 2008;3: 44–54. doi:10.1016/j.stem.2008.05.001
- 840 60. Fabrizio JJ, Boyle M, DiNardo S. A somatic role for eyes absent (*eya*) and sine  
841 oculis (*so*) in *drosophila* spermatocyte development. *Dev Biol.* 2003;258: 117–  
842 128. doi:10.1016/S0012-1606(03)00127-1
- 843 61. Chen D, McKearin DM. A discrete transcriptional silencer in the *bam* gene  
844 determines asymmetric division of the *Drosophila* germline stem cell.  
845 *Development.* 2003;130: 1159–1170. doi:10.1242/dev.00325
- 846 62. Insko ML, Leon A, Tam CH, McKearin DM, Fuller MT. Accumulation of a  
847 differentiation regulator specifies transit amplifying division number in an adult  
848 stem cell lineage. *Proc Natl Acad Sci U S A.* 2009;106: 22311–22316.  
849 doi:10.1073/pnas.0912454106
- 850 63. Chen D, Wu C, Zhao S, Geng Q, Gao Y, Li X, et al. Three RNA Binding Proteins  
851 Form a Complex to Promote Differentiation of Germline Stem Cell Lineage in  
852 *Drosophila*. *PLoS Genet.* 2014;10. doi:10.1371/journal.pgen.1004797
- 853 64. Gonczy P, Matunis E, DiNardo S. bag-of-marbles and benign gonial cell neoplasm  
854 act in the germline to restrict proliferation during *Drosophila* spermatogenesis.  
855 *Development.* 1997;124: 4361–4371.
- 856 65. Athenstaedt K, Daum G. YMR313c/TGL3 Encodes a Novel Triacylglycerol Lipase  
857 Located in Lipid Particles of *Saccharomyces cerevisiae*\*. *J Biol Chem.* 2003;278:  
858 23317–23323. doi:10.1074/jbc.M302577200
- 859 66. Chitraju C, Trötz Müller M, Hartler J, Wolinski H, Thallinger GG, Haemmerle G, et  
860 al. The impact of genetic stress by ATGL deficiency on the lipidome of lipid  
861 droplets from murine hepatocytes. *J Lipid Res.* 2013;54: 2185–2194.  
862 doi:10.1194/jlr.M037952
- 863 67. Grönke S, Mildner A, Fellert S, Tennagels N, Petry S, Müller G, et al. Brummer  
864 lipase is an evolutionary conserved fat storage regulator in *Drosophila*. *Cell*  
865 *Metab.* 2005;1: 323–330. doi:10.1016/j.cmet.2005.04.003
- 866 68. Haemmerle G, Lass A, Zimmermann R, Gorkiewicz G, Meyer C, Rozman J, et al.  
867 Defective Lipolysis and Altered Energy Metabolism in Mice Lacking Adipose  
868 Triglyceride Lipase. *Science.* 2006;312: 734–737. doi:10.1126/science.1123965
- 869 69. Haemmerle G, Moustafa T, Woelkart G, Büttner S, Schmidt A, van de Weijer T, et  
870 al. ATGL-mediated fat catabolism regulates cardiac mitochondrial function via  
871 PPAR- $\alpha$  and PGC-1. *Nat Med.* 2011;17: 1076–1085. doi:10.1038/nm.2439

- 872 70. Huijsman E, van de Par C, Economou C, van der Poel C, Lynch GS, Schoiswohl G,  
873 et al. Adipose triacylglycerol lipase deletion alters whole body energy metabolism  
874 and impairs exercise performance in mice. *Am J Physiol-Endocrinol Metab.*  
875 2009;297: E505–E513. doi:10.1152/ajpendo.00190.2009
- 876 71. Korbilius M, Vujic N, Sachdev V, Obrowsky S, Rainer S, Gottschalk B, et al.  
877 ATGL/CGI-58-Dependent Hydrolysis of a Lipid Storage Pool in Murine  
878 Enterocytes. *Cell Rep.* 2019;28: 1923-1934.e4. doi:10.1016/j.celrep.2019.07.030
- 879 72. Kurat CF, Natter K, Petschnigg J, Wolinski H, Scheuringer K, Scholz H, et al.  
880 Obese Yeast: Triglyceride Lipolysis Is Functionally Conserved from Mammals to  
881 Yeast \*. *J Biol Chem.* 2006;281: 491–500. doi:10.1074/jbc.M508414200
- 882 73. Zimmermann R, Strauss JG, Haemmerle G, Schoiswohl G, Birner-Gruenberger R,  
883 Riederer M, et al. Fat Mobilization in Adipose Tissue Is Promoted by Adipose  
884 Triglyceride Lipase. *Science.* 2004;306: 1383–1386.  
885 doi:10.1126/science.1100747
- 886 74. Attané C, Peyot M-L, Lussier R, Poursharifi P, Zhao S, Zhang D, et al. A beta cell  
887 ATGL-lipolysis/adipose tissue axis controls energy homeostasis and body weight  
888 via insulin secretion in mice. *Diabetologia.* 2016;59: 2654–2663.  
889 doi:10.1007/s00125-016-4105-2
- 890 75. Lee JH, Kong J, Jang JY, Han JS, Ji Y, Lee J, et al. Lipid Droplet Protein LID-1  
891 Mediates ATGL-1-Dependent Lipolysis during Fasting in *Caenorhabditis elegans*.  
892 *Mol Cell Biol.* 2014;34: 4165–4176. doi:10.1128/MCB.00722-14
- 893 76. Tuohetahuntala M, Molenaar MR, Spee B, Brouwers JF, Houweling M, Vaandrager  
894 AB, et al. ATGL and DGAT1 are involved in the turnover of newly synthesized  
895 triacylglycerols in hepatic stellate cells. *J Lipid Res.* 2016;57: 1162–1174.  
896 doi:10.1194/jlr.M066415
- 897 77. Men TT, Thanh DNV, Yamaguchi M, Suzuki T, Hattori G, Arii M, et al. A *Drosophila*  
898 Model for Screening Antiobesity Agents. *BioMed Res Int.* 2016;2016: 1–10.  
899 doi:10.1155/2016/6293163
- 900 78. Li H, Janssens J, Waegeneer MD, Kolluru SS, Davie K, Gardeux V, et al. Fly Cell  
901 Atlas: a single-cell transcriptomic atlas of the adult fruit fly. *bioRxiv*; 2021. p.  
902 2021.07.04.451050. doi:10.1101/2021.07.04.451050
- 903 79. Xu T, Rubin GM. Analysis of genetic mosaics in developing and adult *Drosophila*  
904 tissues. *Development.* 1993;117: 1223–1237.
- 905 80. Kim N, Nakamura H, Masaki H, Kumasawa K, Hirano K, Kimura T. Effect of lipid  
906 metabolism on male fertility. *Biochem Biophys Res Commun.* 2017;485: 686–692.  
907 doi:10.1016/j.bbrc.2017.02.103



- 908 81. Lasko PF, Ashburner M. The product of the *Drosophila* gene *vasa* is very similar to  
909 eukaryotic initiation factor-4A. *Nature*. 1988;335: 611–617. doi:10.1038/335611a0
- 910 82. Resende LPF, Boyle M, Tran D, Fellner T, Jones DL. Headcase Promotes Cell  
911 Survival and Niche Maintenance in the *Drosophila* Testis. Bökel C, editor. *PLoS*  
912 *ONE*. 2013;8: e68026. doi:10.1371/journal.pone.0068026
- 913 83. Kiger AA, White-Cooper H, Fuller MT. Somatic support cells restrict germline stem  
914 cell self-renewal and promote differentiation. *Nature*. 2000;407: 750–754.  
915 doi:10.1038/35037606
- 916 84. Lin TY, Viswanathan S, Wood C, Wilson PG, Wolf N, Fuller MT. Coordinate  
917 developmental control of the meiotic cell cycle and spermatid differentiation in  
918 *Drosophila* males. *Development*. 1996;122: 1331–1341.
- 919 85. Eichmann TO, Kumari M, Haas JT, Farese RV, Zimmermann R, Lass A, et al.  
920 Studies on the substrate and stereo/regioselectivity of adipose triglyceride lipase,  
921 hormone-sensitive lipase, and diacylglycerol-O-acyltransferases. *J Biol Chem*.  
922 2012;287: 41446–41457. doi:10.1074/jbc.M112.400416
- 923 86. Schweiger M, Schreiber R, Haemmerle G, Lass A, Fledelius C, Jacobsen P, et al.  
924 Adipose Triglyceride Lipase and Hormone-sensitive Lipase Are the Major  
925 Enzymes in Adipose Tissue Triacylglycerol Catabolism \*. *J Biol Chem*. 2006;281:  
926 40236–40241. doi:10.1074/jbc.M608048200
- 927 87. Missaglia S, Maggi L, Mora M, Gibertini S, Blasevich F, Agostoni P, et al. Late  
928 onset of neutral lipid storage disease due to novel PNPLA2 mutations causing  
929 total loss of lipase activity in a patient with myopathy and slight cardiac  
930 involvement. *Neuromuscul Disord*. 2017;27: 481–486.  
931 doi:10.1016/j.nmd.2017.01.011
- 932 88. Williams ML, Coleman RA, Placezk D, Grunfeld C. Neutral lipid storage disease: a  
933 possible functional defect in phospholipid-linked triacylglycerol metabolism.  
934 *Biochim Biophys Acta BBA - Mol Basis Dis*. 1991;1096: 162–169.  
935 doi:10.1016/0925-4439(91)90055-E
- 936 89. Yang L, Liang J, Lam SM, Yavuz A, Shui G, Ding M, et al. Neuronal lipolysis  
937 participates in PUFA-mediated neural function and neurodegeneration. *EMBO*  
938 *Rep*. 2020;21. doi:10.15252/embr.202050214
- 939 90. Nazario-Yepiz NO, Fernández Sobaberas J, Lyman R, Campbell MR, Shankar V,  
940 Anholt RRH, et al. Physiological and metabolomic consequences of reduced  
941 expression of the *Drosophila* *brummer* triglyceride Lipase. Melkani GC, editor.  
942 *PLOS ONE*. 2021;16: e0255198. doi:10.1371/journal.pone.0255198
- 943 91. Giedt MS, Thomalla JM, Johnson MR, Lai ZW, Tootle TL, Welte MA. Adipose  
944 triglyceride lipase promotes prostaglandin-dependent actin remodeling by

- 945 regulating substrate release from lipid droplets. *Cell Biology*; 2021 Aug.  
946 doi:10.1101/2021.08.02.454724
- 947 92. Beller M, Bulankina AV, Hsiao H-H, Urlaub H, Jäckle H, Kühnlein RP. PERILIPIN-  
948 Dependent Control of Lipid Droplet Structure and Fat Storage in *Drosophila*. *Cell*  
949 *Metab.* 2010;12: 521–532. doi:10.1016/j.cmet.2010.10.001
- 950 93. Buszczak M, Lu X, Segraves WA, Chang TY, Cooley L. Mutations in the midway  
951 Gene Disrupt a *Drosophila* Acyl Coenzyme A: Diacylglycerol Acyltransferase.  
952 *Genetics.* 2002;160: 1511–1518.
- 953 94. Martínez BA, Hoyle RG, Yeudall S, Granade ME, Harris TE, Castle JD, et al. Innate  
954 immune signaling in *Drosophila* shifts anabolic lipid metabolism from triglyceride  
955 storage to phospholipid synthesis to support immune function. *PLOS Genet.*  
956 2020;16: e1009192. doi:10.1371/journal.pgen.1009192
- 957 95. Freeman DA, Ascoli M. Studies on the source of cholesterol used for steroid  
958 biosynthesis in cultured Leydig tumor cells. *J Biol Chem.* 1982;257: 14231–14238.
- 959 96. Wang F, Chen Z, Ren X, Tian Y, Wang F, Liu C, et al. Hormone-sensitive lipase  
960 deficiency alters gene expression and cholesterol content of mouse testis.  
961 *Reproduction.* 2017;153: 175–185. doi:10.1530/REP-16-0484
- 962 97. Walther TC, Farese RV. Lipid droplets and cellular lipid metabolism. *Annu Rev*  
963 *Biochem.* 2012;81: 687–714. doi:10.1146/annurev-biochem-061009-102430
- 964 98. Olzmann JA, Carvalho P. Dynamics and functions of lipid droplets. *Nat Rev Mol*  
965 *Cell Biol.* 2019;20: 137–155. doi:10.1038/s41580-018-0085-z
- 966 99. Birse RT, Choi J, Reardon K, Rodriguez J, Graham S, Diop S, et al. High-fat-diet-  
967 induced obesity and heart dysfunction are regulated by the TOR pathway in  
968 *Drosophila*. *Cell Metab.* 2010;12: 533–44. doi:10.1016/j.cmet.2010.09.014
- 969 100. Molaei M, Vandehoef C, Karpac J. NF- $\kappa$ B Shapes Metabolic Adaptation by  
970 Attenuating Foxo-Mediated Lipolysis in *Drosophila*. *Dev Cell.* 2019;49: 802-  
971 810.e6. doi:10.1016/j.devcel.2019.04.009
- 972 101. Alic N, Andrews TD, Giannakou ME, Papatheodorou I, Slack C, Hoddinott MP, et  
973 al. Genome-wide dFOXO targets and topology of the transcriptomic response to  
974 stress and insulin signalling. *Mol Syst Biol.* 2011;7: 502. doi:10.1038/msb.2011.36
- 975 102. Junger MA, Rintelen F, Stocker H, Wasserman JD, Vegh M, Radimerski T, et al.  
976 The *Drosophila* forkhead transcription factor FOXO mediates the reduction in cell  
977 number associated with reduced insulin signaling. *J Biol.* 2003;2: 20.  
978 doi:10.1186/1475-4924-2-20

- 979 103. Zinke I, Schutz CS, Katzenberger JD, Bauer M, Pankratz MJ. Nutrient control of  
980 gene expression in *Drosophila*: microarray analysis of starvation and sugar-  
981 dependent response. *EMBO J.* 2002;21: 6162–73.
- 982 104. Puig O, Tjian R. Transcriptional feedback control of insulin receptor by  
983 dFOXO/FOXO1. *Genes Dev.* 2005;19: 2435–2446. doi:10.1101/gad.1340505
- 984 105. Kang P, Chang K, Liu Y, Bouska M, Birnbaum A, Karashchuk G, et al. *Drosophila*  
985 Kruppel homolog 1 represses lipolysis through interaction with dFOXO. *Sci Rep.*  
986 2017;7: 16369. doi:10.1038/s41598-017-16638-1
- 987 106. Bartz R, Zehmer JK, Zhu M, Chen Y, Serrero G, Zhao Y, et al. Dynamic activity of  
988 lipid droplets: protein phosphorylation and GTP-mediated protein translocation. *J*  
989 *Proteome Res.* 2007;6: 3256–3265. doi:10.1021/pr070158j
- 990 107. Pagnon J, Matzaris M, Stark R, Meex RCR, Macaulay SL, Brown W, et al.  
991 Identification and functional characterization of protein kinase A phosphorylation  
992 sites in the major lipolytic protein, adipose triglyceride lipase. *Endocrinology.*  
993 2012;153: 4278–4289. doi:10.1210/en.2012-1127
- 994 108. Narbonne P, Roy R. *Caenorhabditis elegans* dauers need LKB1/AMPK to ration  
995 lipid reserves and ensure long-term survival. *Nature.* 2009;457: 210–214.  
996 doi:10.1038/nature07536
- 997 109. Ahmadian M, Abbott MJ, Tang T, Hudak CSS, Kim Y, Bruss M, et al.  
998 Desnutrin/ATGL is regulated by AMPK and is required for a brown adipose  
999 phenotype. *Cell Metab.* 2011;13: 739–748. doi:10.1016/j.cmet.2011.05.002
- 1000 110. Amoyel M, Hillion K-H, Margolis SR, Bach EA. Somatic stem cell differentiation is  
1001 regulated by PI3K/Tor signaling in response to local cues. *Dev Camb Engl.*  
1002 2016;143: 3914–3925. doi:10.1242/dev.139782
- 1003 111. Amoyel M, Simons BD, Bach EA. Neutral competition of stem cells is skewed by  
1004 proliferative changes downstream of Hh and Hpo. *EMBO J.* 2014;33: 2295–2313.  
1005 doi:10.15252/embj.201387500
- 1006 112. Ueishi S, Shimizu H, Inoue Y. Male Germline Stem Cell Division and  
1007 Spermatocyte Growth Require Insulin Signaling in *Drosophila*. *Cell Struct Funct.*  
1008 2009;34: 61–69. doi:10.1247/csf.08042
- 1009 113. Hof-Michel S, Cigoja L, Huhn S, Bökel C. Innate immune signalling drives loser  
1010 cell elimination during stem cell competition in the *Drosophila* testis.  
1011 *Developmental Biology*; 2020 Mar. doi:10.1101/2020.03.05.979161
- 1012 114. Couderc J-L, Richard G, Vachias C, Mirouse V. *Drosophila* LKB1 is required for  
1013 the assembly of the polarized actin structure that allows spermatid  
1014 individualization. White-Cooper H, editor. *PLOS ONE.* 2017;12: e0182279.  
1015 doi:10.1371/journal.pone.0182279

- 1016 115. Steinhauer J, Statman B, Fagan JK, Borck J, Surabhi S, Yarikipati P, et al.  
1017 Combover interacts with the axonemal component Rsp3 and is required for  
1018 *Drosophila* sperm individualization. *Dev Camb Engl*. 2019;146: dev179275.  
1019 doi:10.1242/dev.179275
- 1020 116. Tartarin P, Guibert E, Touré A, Ouiste C, Leclerc J, Sanz N, et al. Inactivation of  
1021 AMPK $\alpha$ 1 induces asthenozoospermia and alters spermatozoa morphology.  
1022 *Endocrinology*. 2012;153: 3468–3481. doi:10.1210/en.2011-1911
- 1023 117. Martin-Hidalgo D, Hurtado de Llera A, Calle-Guisado V, Gonzalez-Fernandez L,  
1024 Garcia-Marin L, Bragado MJ. AMPK Function in Mammalian Spermatozoa. *Int J*  
1025 *Mol Sci*. 2018;19: 3293. doi:10.3390/ijms19113293
- 1026 118. Pitetti J-L, Calvel P, Zimmermann C, Conne B, Papaioannou MD, Aubry F, et al.  
1027 An Essential Role for Insulin and IGF1 Receptors in Regulating Sertoli Cell  
1028 Proliferation, Testis Size, and FSH Action in Mice. *Mol Endocrinol*. 2013;27: 814–  
1029 827. doi:10.1210/me.2012-1258
- 1030 119. Thurmond J, Goodman JL, Strelets VB, Attrill H, Gramates LS, Marygold SJ, et al.  
1031 FlyBase 2.0: the next generation. *Nucleic Acids Res*. 2018;47: D759–D765.  
1032 doi:10.1093/nar/gky1003
- 1033 120. White-Cooper H. Spermatogenesis. In: Henderson DS, editor. *Drosophila*  
1034 *Cytogenetics Protocols*. Totowa, NJ: Humana Press; 2004. pp. 45–75.  
1035 doi:10.1385/1-59259-665-7:45
- 1036 121. Fabian L, Brill JA. *Drosophila* spermiogenesis. *Spermatogenesis*. 2012;2: 197–  
1037 212. doi:10.4161/spmg.21798
- 1038 122. Schindelin J, Arganda-Carreras I, Frise E, Kaynig V, Longair M, Pietzsch T, et al.  
1039 Fiji: an open-source platform for biological-image analysis. *Nat Methods*. 2012;9:  
1040 676–682. doi:10.1038/nmeth.2019
- 1041 123. Yu H, Villanueva N, Bittar T, Arsenault E, Labonté B, Huan T. Parallel  
1042 metabolomics and lipidomics enables the comprehensive study of mouse brain  
1043 regional metabolite and lipid patterns. *Anal Chim Acta*. 2020;1136: 168–177.  
1044 doi:10.1016/j.aca.2020.09.051
- 1045 124. Tsugawa H, Cajka T, Kind T, Ma Y, Higgins B, Ikeda K, et al. MS-DIAL: data-  
1046 independent MS/MS deconvolution for comprehensive metabolome analysis. *Nat*  
1047 *Methods*. 2015;12: 523–526. doi:10.1038/nmeth.3393
- 1048 125. Yu H, Huan T. Patterned Signal Ratio Biases in Mass Spectrometry-Based  
1049 Quantitative Metabolomics. *Anal Chem*. 2021;93: 2254–2262.  
1050 doi:10.1021/acs.analchem.0c04113

1051

1052  
1053

1054

# Figure 1 Lipid droplets are present in early-stage somatic and germline cells

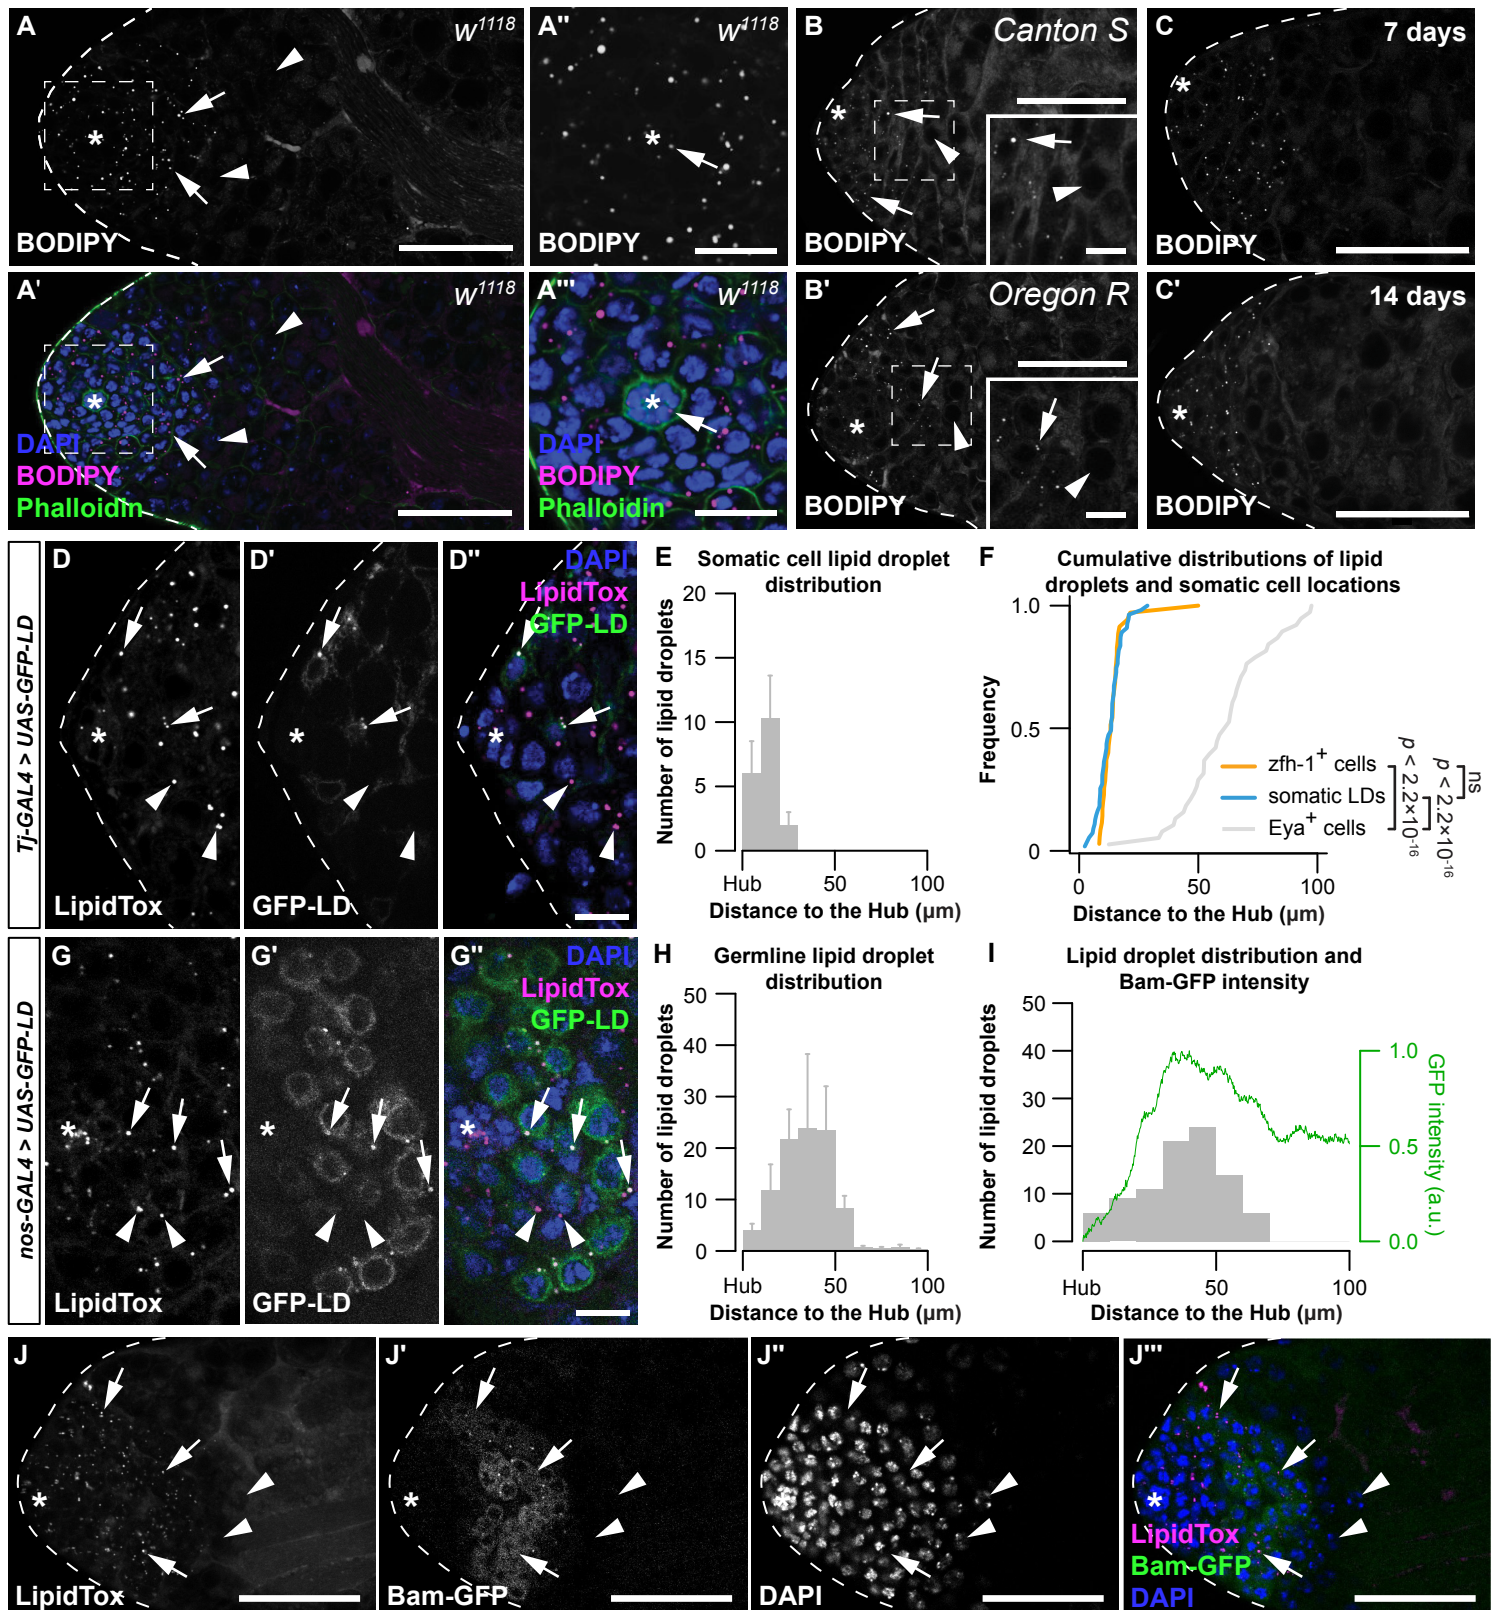

## Figure 2 *bmm* regulates testis lipid droplets in a cell autonomous manner

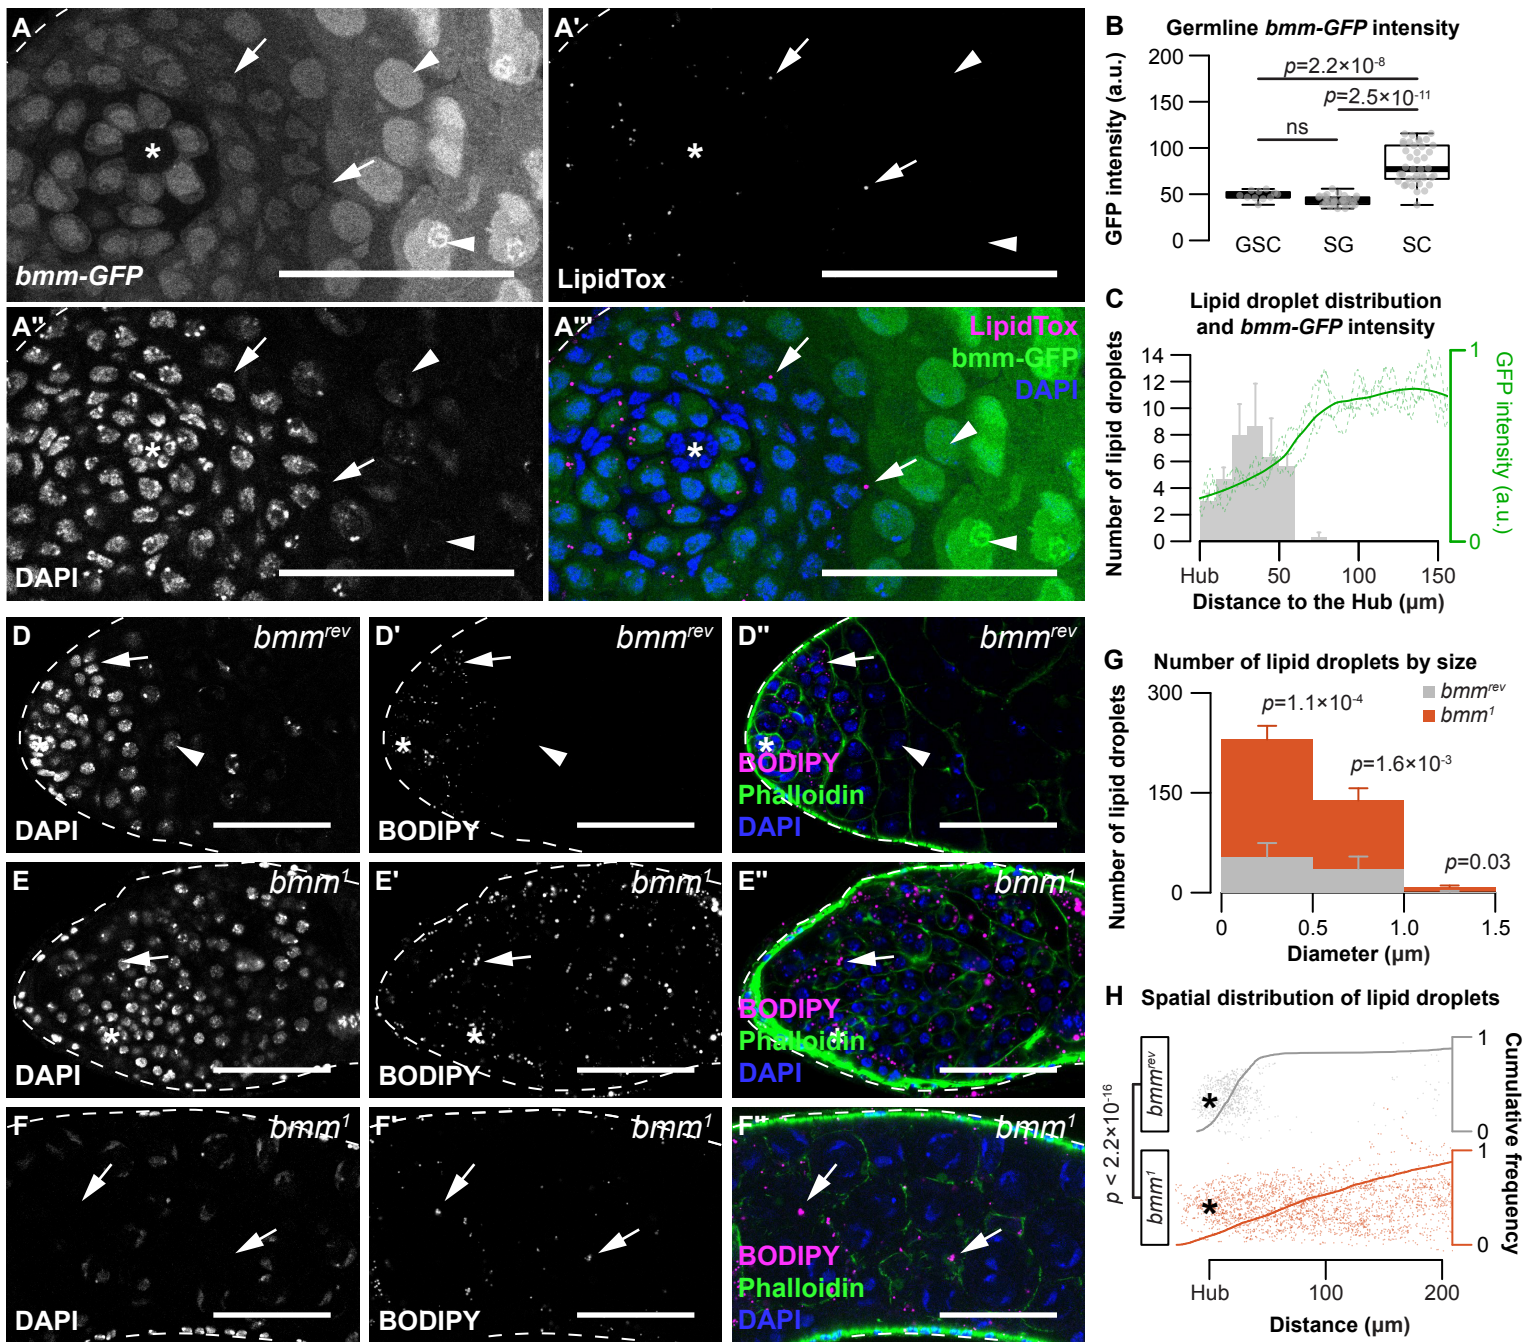

### I Number of lipid droplet during germline development

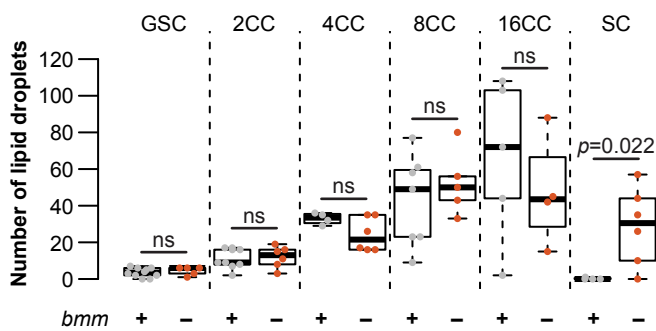



### Figure 3 A cell autonomous role of *brummer* in regulating spermatogenesis.

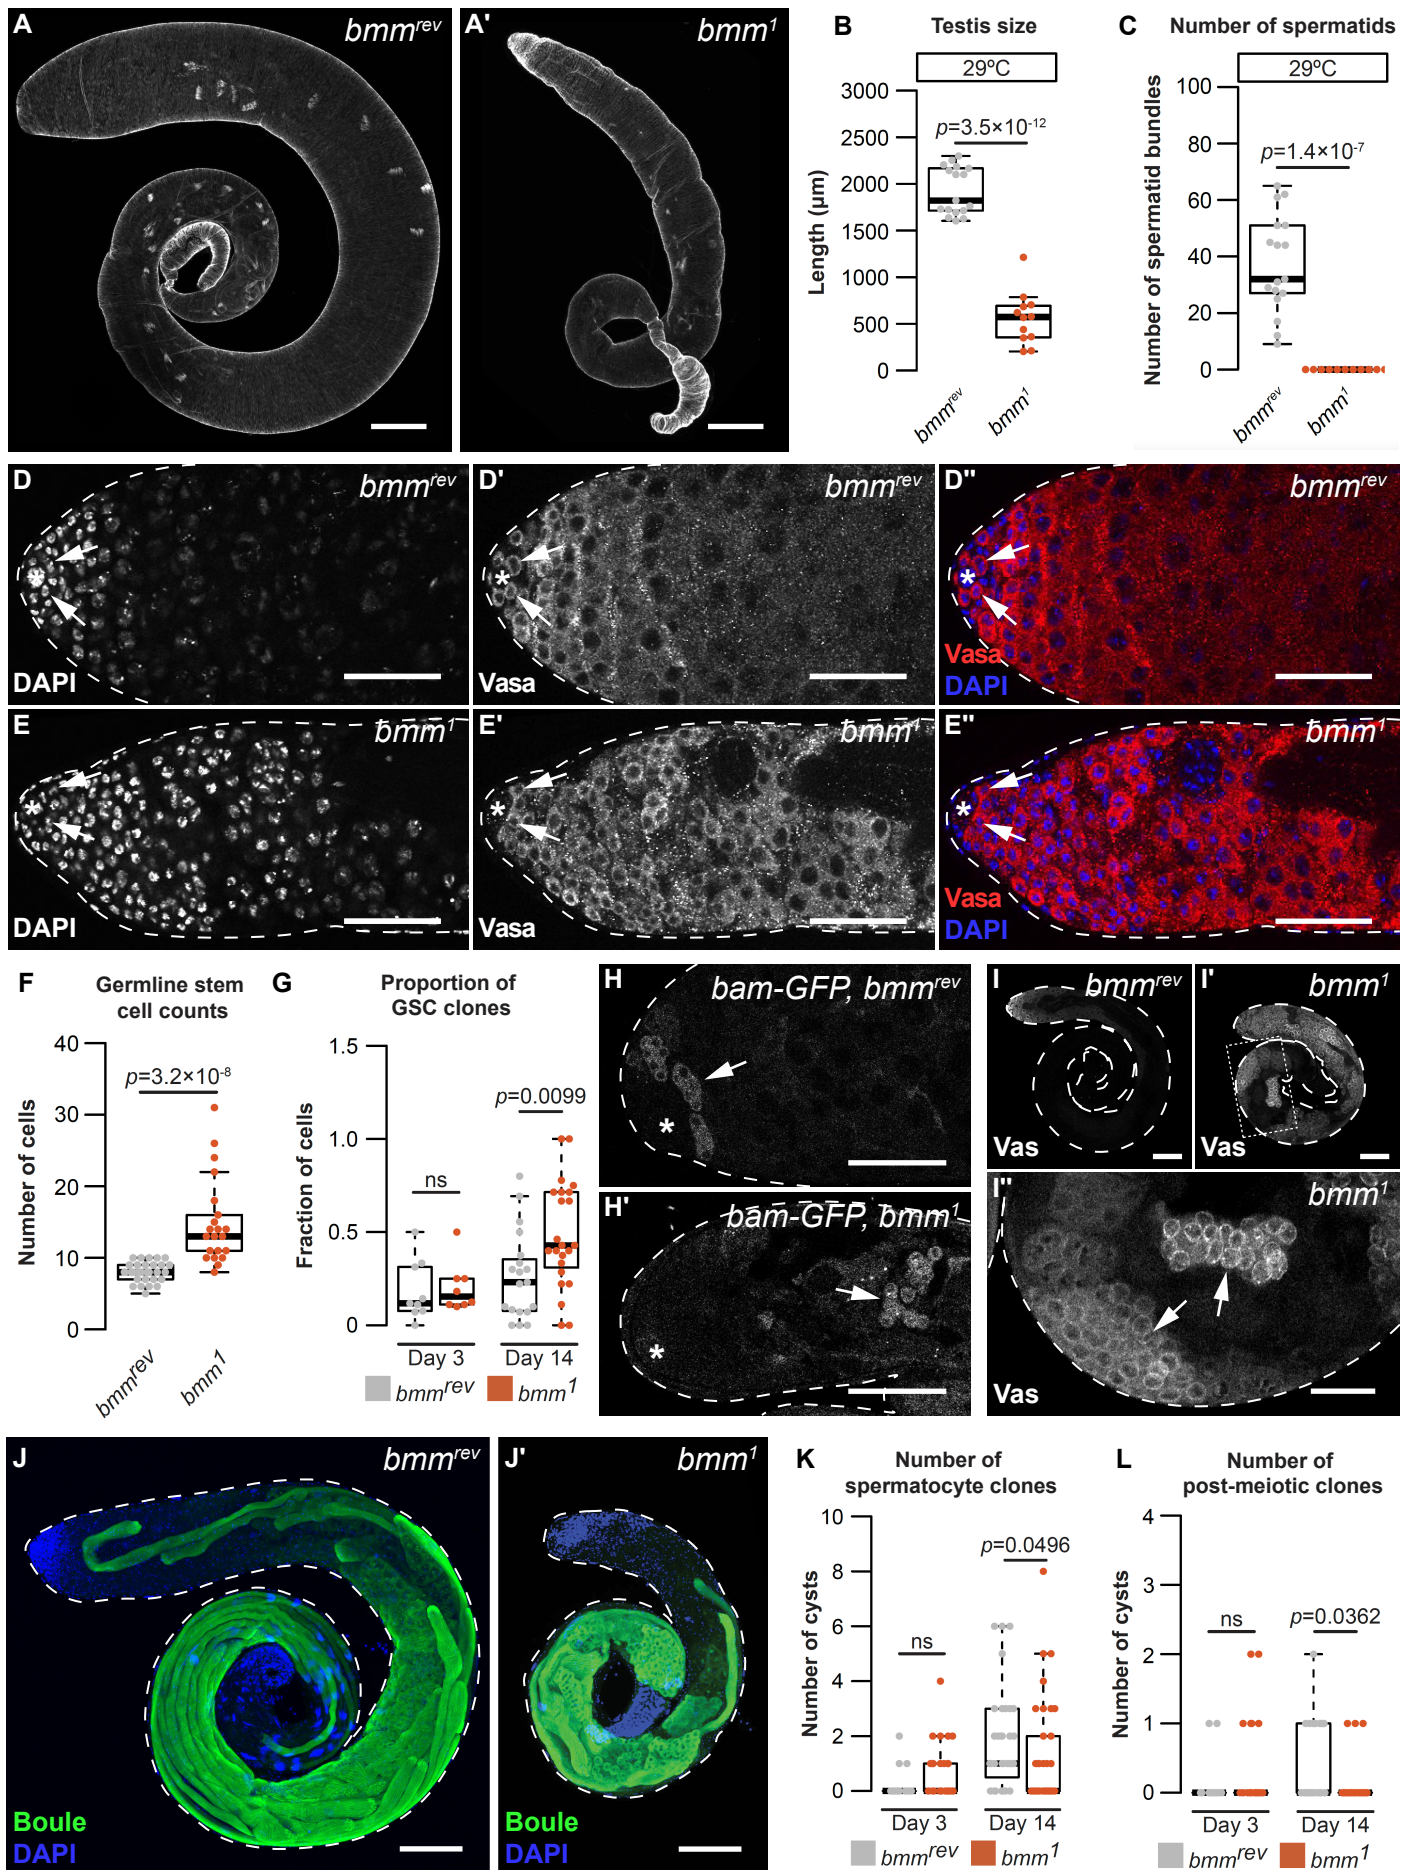

**Figure 4 Loss of *brummer* disrupts triglyceride homeostasis and leads to spermatogenic defects.**

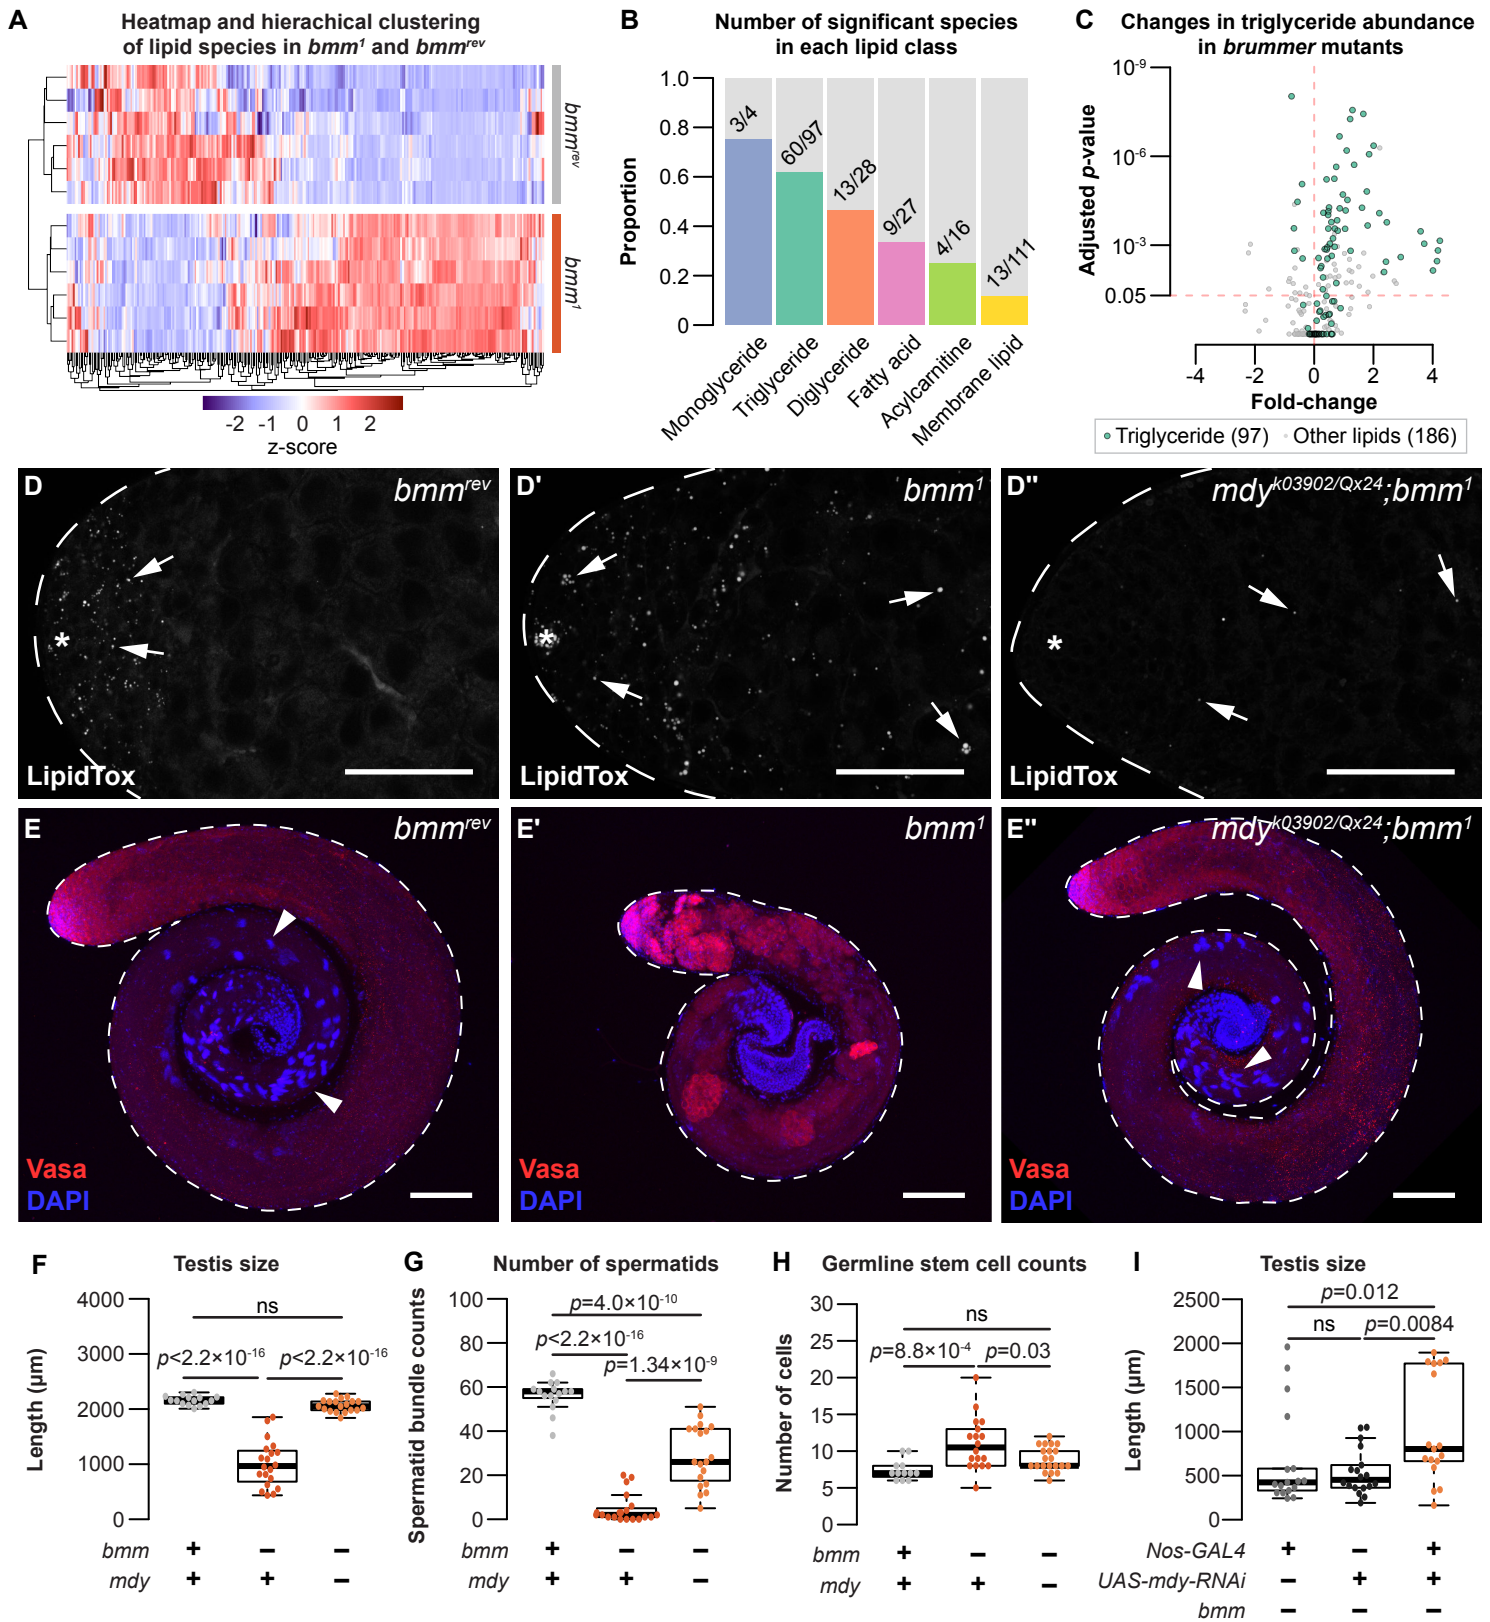

## Supplemental Figure 1 - Cholesterol is absent from testis lipid droplets

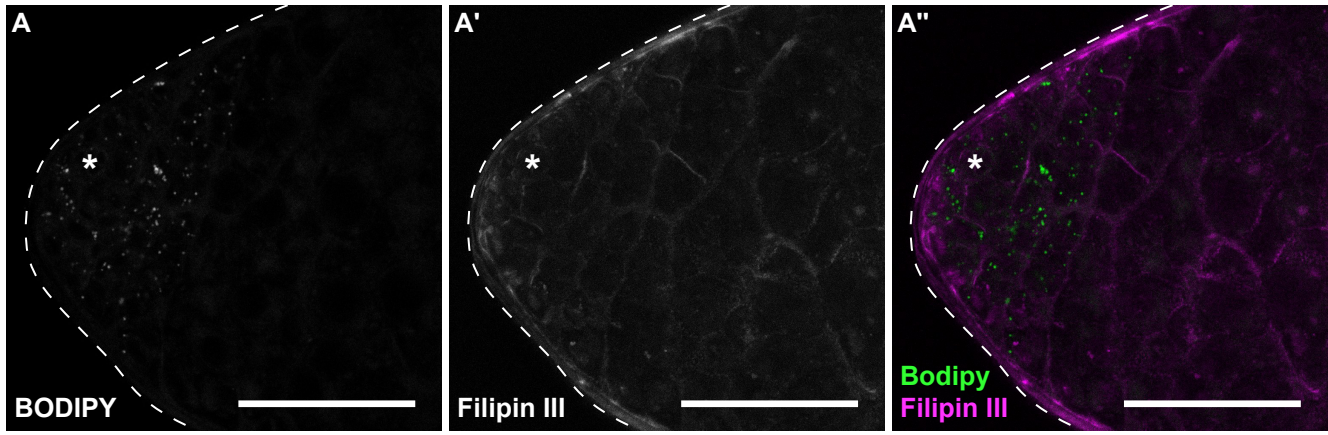

# Supplemental Figure 2 - *brummer* regulates testis lipid droplets in a cell autonomous manner

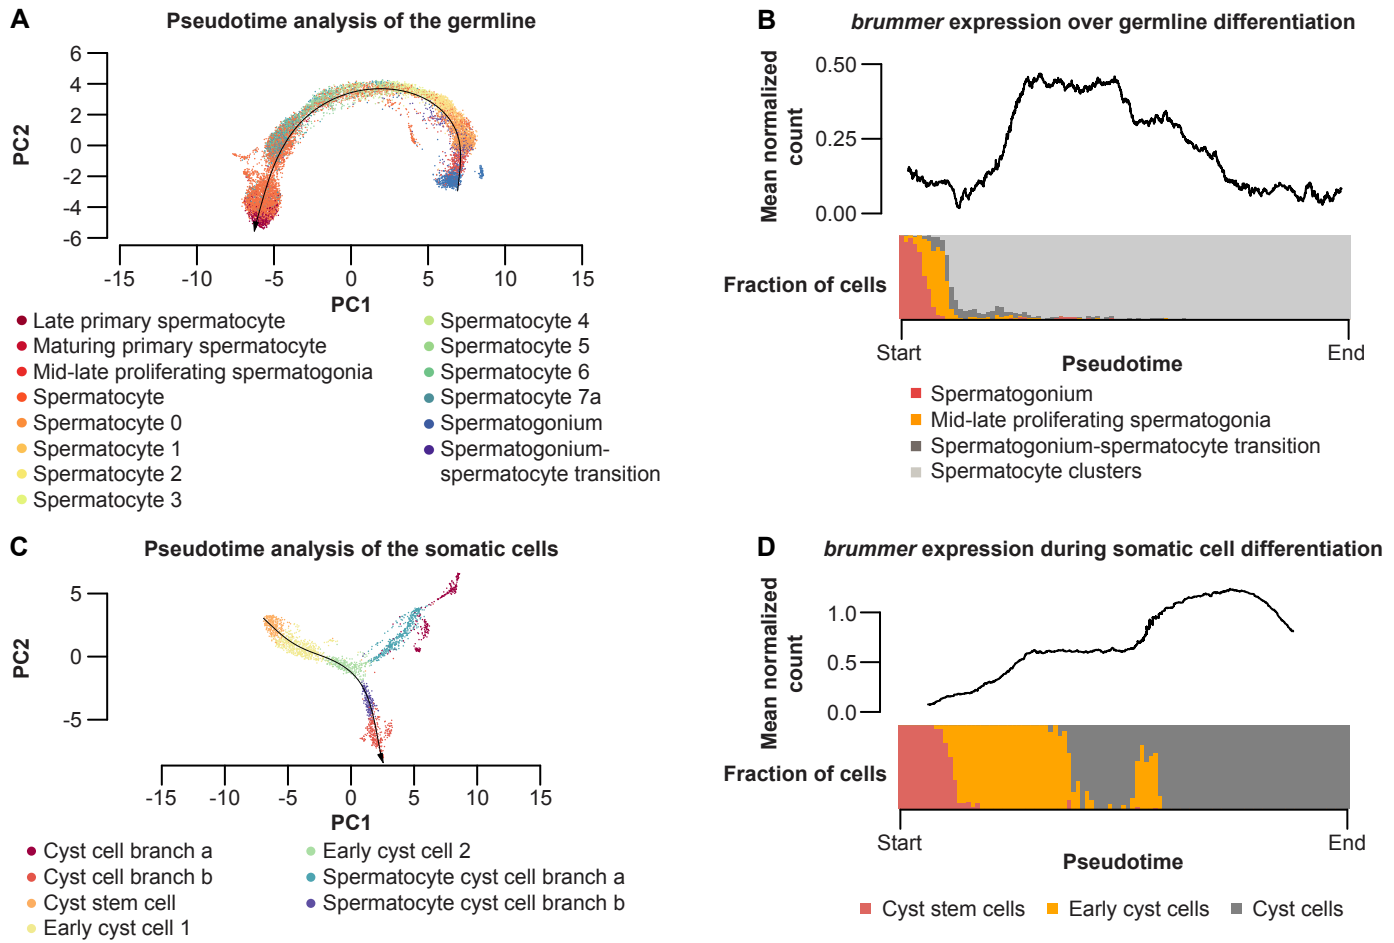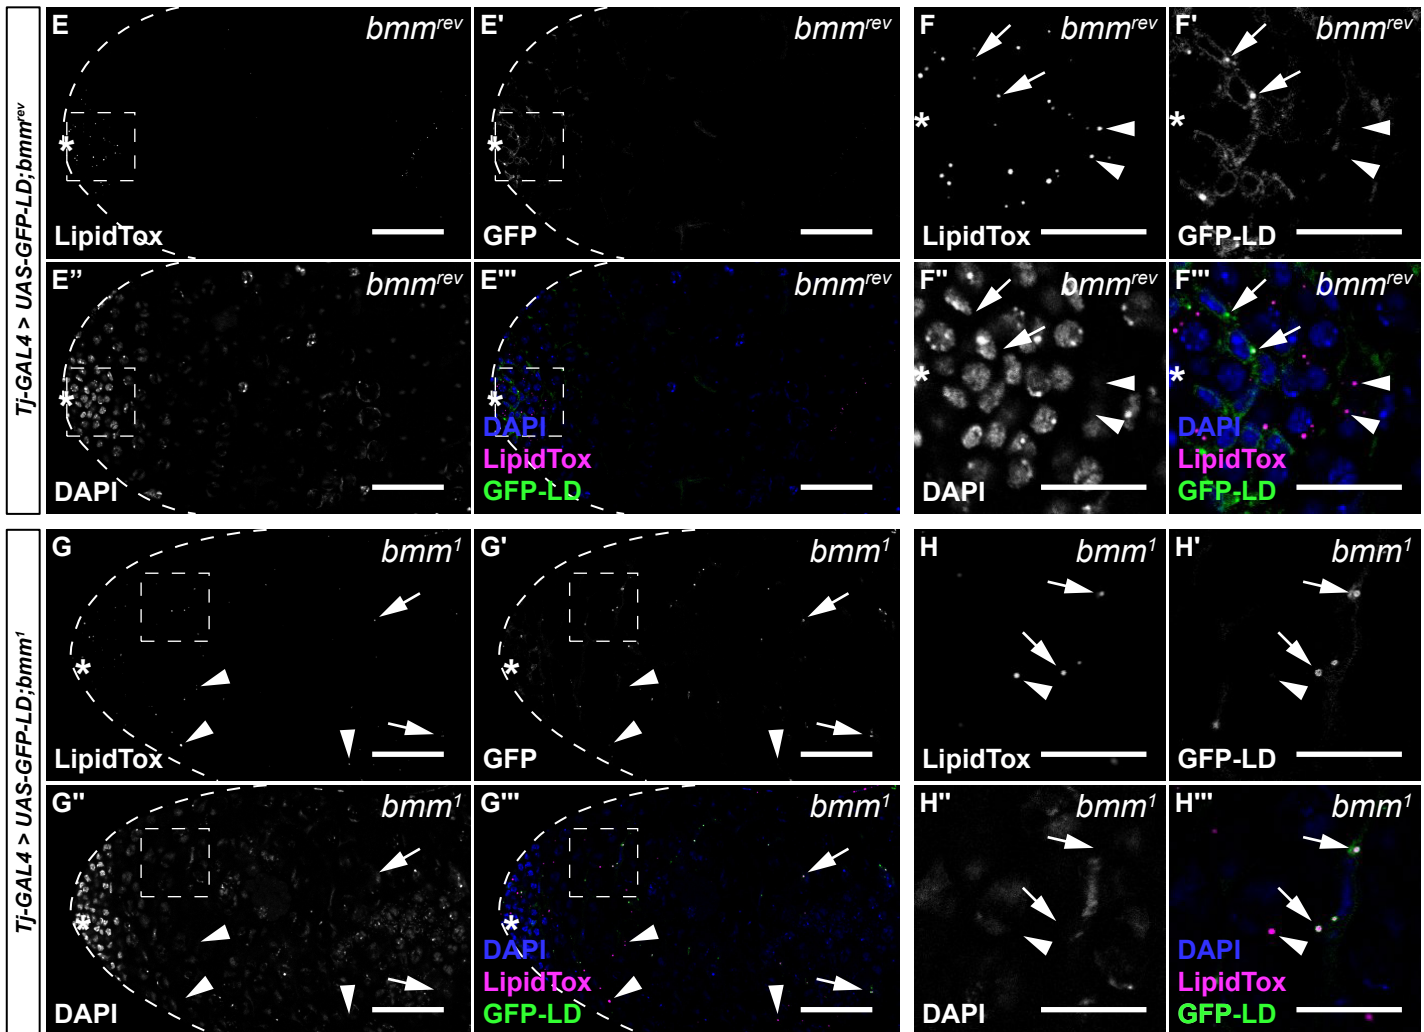

**Supplemental Figure 3 - Additional characterization of testis development and spermatogenesis in animals lacking *brummer*.**

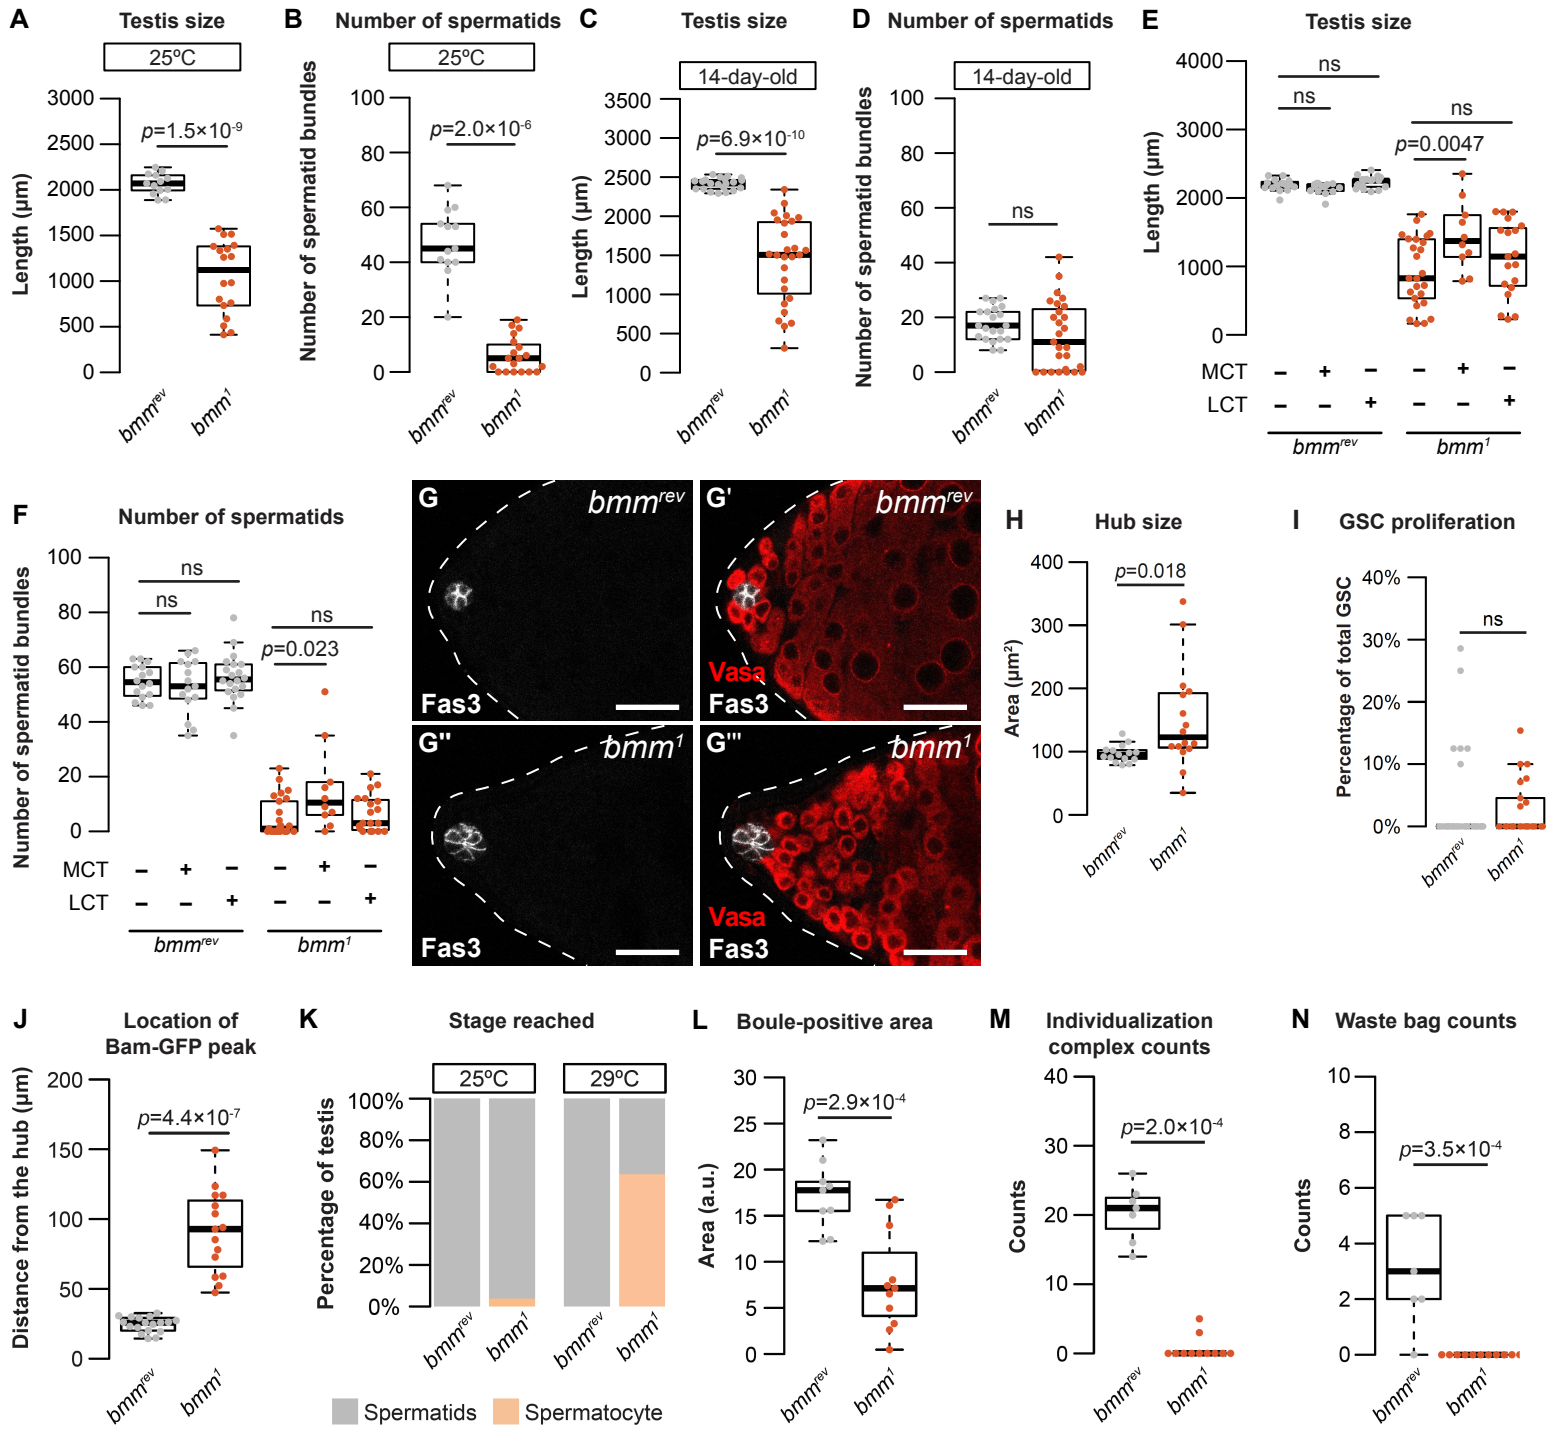

# Supplemental Figure 4 – Lipidomic analysis of animals lacking *brummer*

**A** Correlation between the number of double bonds and fold-change in triglycerides

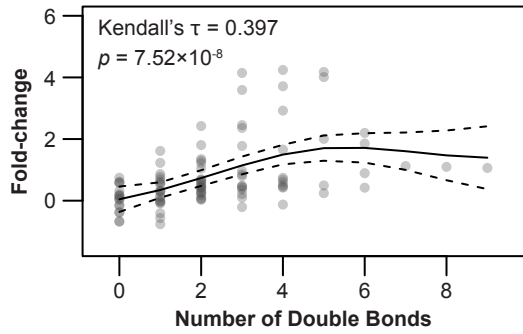

**B** Correlation between the number of carbons and fold-change in triglycerides

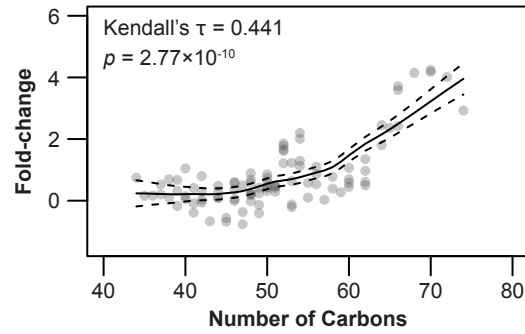

**C** Changes in monoglyceride and diglyceride abundance in *brummer* mutants

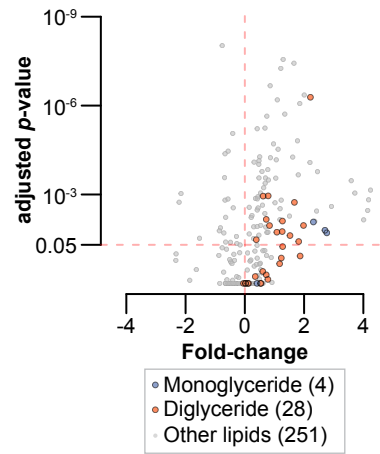

**D** Identity of monoacylglyceride and diglyceride with significant changes in *brummer* mutants

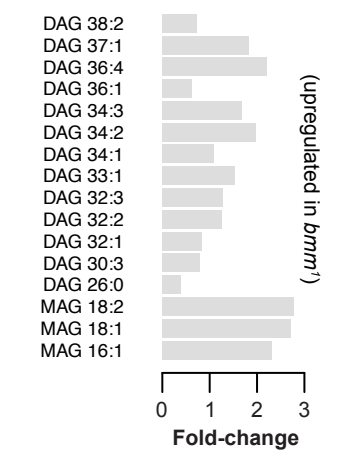

**E** Changes in fatty acids and acyl-carnitine abundance in *brummer* mutants

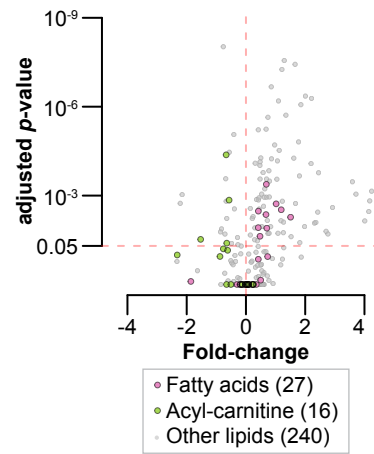

**F** Identity of fatty acid and acyl-carnitine with significant changes in *brummer* mutants

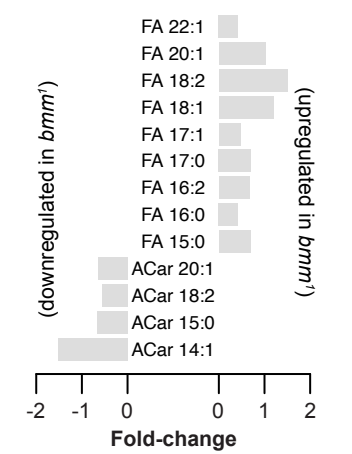

**G** Changes in membrane lipid abundance in *brummer* mutants

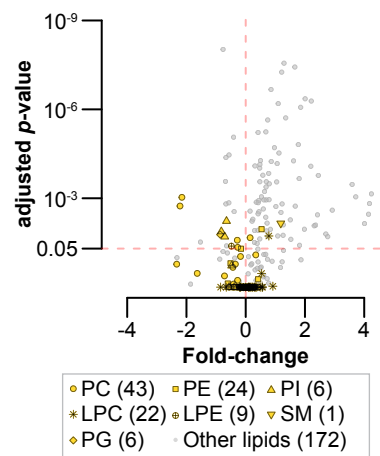

**H** Identity of membrane lipid with significant changes in *brummer* mutants

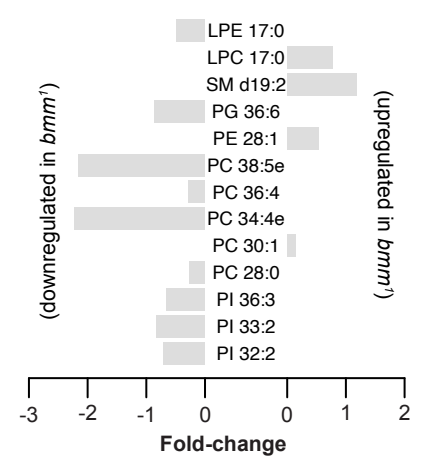

**I** Number of lipid droplets

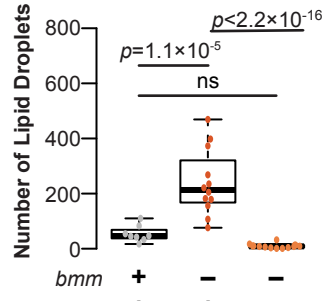

**J** Germline stem cell counts

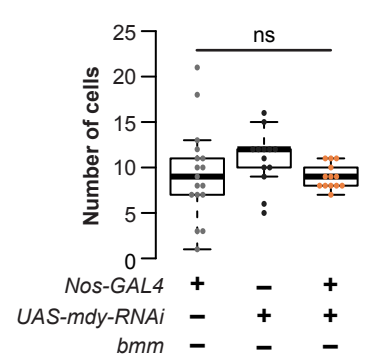

Source: https://www.biorxiv.org/content/10.1101/2022.12.16.520841v2.full.pdf
