# Supplementary material for: An important role for triglyceride in regulating spermatogenesis
Source: bioRxiv preprint, doi:10.1101/2022.12.16.520841, version 4 (2024-01-24)
Supplement: Supplemental file 3 [file 520841_file15.xlsx]

## Sheet: 4B, C, Supp 4A, B, M, N
genotype	temperature	#IC	#WB	#SP	spermatids	length
bmmrev	25	20	2	41	41	2092.07
bmmrev	25	14	3	40	40	2246.6
bmmrev	25	16	5	44	44	2126.69
bmmrev	25	21	0	20	20	2206.92
bmmrev	25	22	2	45	45	2159.43
bmmrev	25	26	5	53	53	2174.03
bmmrev	25	23	5	40	40	2004.94
bmm1	25	0	0	5	5	974.422
bmm1	25	0	0	7	7	982.316
bmm1	25	5	0	19	19	1573.57
bmm1	25	3	0	11	11	1380.62
bmm1	25	0	0	0	0	801.423
bmm1	25	0	0	2	2	586.9
bmm1	25	0	0	0	0	412.353
bmm1	25	0	0	0	0	732.614
bmm1	25	0	0	0	0	760.99
bmm1	25	0	0	0	0	435.284
bmm1	25	0	0	0	0	509.324
bmmrev	29	12	0	29	29	1626.31
bmmrev	29	9	0	25	25	1762.77
bmmrev	29	0	0	32	32	1693.86
bmmrev	29	6	0	12	12	1730.12
bmmrev	29	4	0	9	9	1636.31
bmmrev	29	6	0	27	27	1603.4
bmmrev	29	0	0	17	17	1713.3
bmmrev	29	10	0	31	31	1724.57
bmmrev	29	6	0	28	28	1822.02
bmm1	29	0	0	0	0	1213.19
bmm1	29	0	0	0	0	684.198
bmm1	29	0	0	0	0	211.054
bmm1	29	0	0	0	0	703.614
bmm1	29	0	0	0	0	203.856
bmm1	29	0	0	0	0	577.888
bmm1	29	0	0	0	0	786.35
bmm1	29	0	0	0	0	349.705
bmmrev	25	NA	NA	NA	68	2046.04
bmmrev	25	NA	NA	NA	60	1954.95
bmmrev	25	NA	NA	NA	37	1890.17
bmmrev	25	NA	NA	NA	59	1887.76
bmmrev	25	NA	NA	NA	54	2070.22
bmmrev	25	NA	NA	NA	53	1993.89
bmmrev	25	NA	NA	NA	NA	NA
bmm1	25	NA	NA	NA	14	NA
bmm1	25	NA	NA	NA	9	1260.94
bmm1	25	NA	NA	NA	17	1511.71
bmm1	25	NA	NA	NA	2	1391.96
bmm1	25	NA	NA	NA	16	1514.35
bmm1	25	NA	NA	NA	3	1350.69
bmm1	25	NA	NA	NA	6	1333.94
bmm1	25	NA	NA	NA	5	1269.01
bmmrev	29	NA	NA	NA	44	2204.07
bmmrev	29	NA	NA	NA	51	2100.13
bmmrev	29	NA	NA	NA	44	2101.11
bmmrev	29	NA	NA	NA	61	2166.55
bmmrev	29	NA	NA	NA	51	2298.77
bmmrev	29	NA	NA	NA	65	2143.23
bmmrev	29	NA	NA	NA	62	2252.29
bmmrev	29	NA	NA	NA	45	2183.92
bmm1	29	NA	NA	NA	0	361.896
bmm1	29	NA	NA	NA	0	439.233
bmm1	29	NA	NA	NA	0	621.087
bmm1	29	NA	NA	NA	0	567.908

## Sheet: 4C statistics
Test for normality
bmm[1]:	Shapiro-Wilk normality test
	data: d25C$spermatids[d25C$genotype == "bmm1"]
	W = 0.85784, p-value = 0.009023
bmm[rev]:	Shapiro-Wilk normality test
	data: d25C$spermatids[d25C$genotype == "bmmrev"]
	W = 0.95999, p-value = 0.7534
Test for difference
	Kruskal-Wallis rank sum test
	data: spermatids by genotype
	Kruskal-Wallis chi-squared = 22.616, df = 1, p-value =
	1.978e-06

## Sheet: Supp 4B statistics a
Test for difference:
	Welch Two Sample t-test
	data: spermatids by genotype
	t = 8.8665, df = 16, p-value = 1.425e-07
	alternative hypothesis: true difference in means between group bmmrev and group bmm1 is not equal to 0
	95 percent confidence interval:
	28.33264 46.13795
	sample estimates:
	mean in group bmmrev mean in group bmm1
	37.23529 0.00000
	Kruskal-Wallis rank sum test
	data: spermatids by genotype
	Kruskal-Wallis chi-squared = 21.958, df = 1, p-value =
	2.787e-06

## Sheet: 4B statistics
Test for normality
bmm[1]:	Shapiro-Wilk normality test
	data: d25C$length[d25C$genotype == "bmm1"]
	W = 0.90499, p-value = 0.07025
bmm[rev]:	Shapiro-Wilk normality test
	data: d25C$length[d25C$genotype == "bmmrev"]
	W = 0.96348, p-value = 0.8063
Test for difference
	Welch Two Sample t-test
	data: length by genotype
	t = 10.228, df = 20.768, p-value = 1.464e-09
	alternative hypothesis: true difference in means between group bmmrev and group bmm1 is not equal to 0
	95 percent confidence interval:
	814.2186 1230.1857
	sample estimates:
	mean in group bmmrev mean in group bmm1
	2065.670 1043.468

## Sheet: Supp 4A statistics
Test for normality
bmm[1]:	Shapiro-Wilk normality test
	data: d25C$length[d25C$genotype == "bmm1"]
	W = 0.92674, p-value = 0.3469
bmm[rev]:	Shapiro-Wilk normality test
	data: d25C$length[d25C$genotype == "bmmrev"]
	W = 0.85432, p-value = 0.01249
Test for difference
	Welch Two Sample t-test
	data: length by genotype
	t = 13.403, df = 22.419, p-value = 3.481e-12
	alternative hypothesis: true difference in means between group bmmrev and group bmm1 is not equal to 0
	95 percent confidence interval:
	1155.895 1578.548
	sample estimates:
	mean in group bmmrev mean in group bmm1
	1927.2197 559.9979

## Sheet: Supp 4M statistics
Test for normality
bmm[1]:	Shapiro-Wilk normality test
	data: d25C$`#IC`[d25C$genotype == "bmm1"]
	W = 0.51094, p-value = 2.055e-06
bmm[rev]:	Shapiro-Wilk normality test
	data: d25C$`#IC`[d25C$genotype == "bmmrev"]
	W = 0.96253, p-value = 0.8401
Test for difference
	Kruskal-Wallis rank sum test
	data: #IC by genotype
	Kruskal-Wallis chi-squared = 13.876, df = 1, p-value =
	0.0001952

## Sheet: Supp 4N statistics
Test for difference
	Kruskal-Wallis rank sum test
	data: #WB by genotype
	Kruskal-Wallis chi-squared = 12.766, df = 1, p-value =
	0.000353

## Sheet: 4F, Supp 4I
genotype	testis	GSC	pH3 zfh-1	pH3 GSC	pH3 GB	pH3 2CC	pH3 4CC	pH3 8CC	pH3 16CC	comments
bmm[1]	1	16	1	0	2	1	1	0	0
bmm[1]	2	11	2	0	2	0	1	0	0
bmm[1]	3	24	4	0	1	0	1	0	0
bmm[1]	4	14	0	0	3	0	0	1	1
bmm[1]	5									got a FB shaddow
bmm[1]	6	13	1	2	3	0	0	4	1
bmm[1]	7	11	1	0	1	0	0	1	1
bmm[1]	8	15	1	0	0	1	1	0	0
bmm[1]	9	10	0	1	0	0	0	0	0
bmm[1]	10	26	4	1	1	0	0	0	0
bmm[1]	11		2							Hard to tell which ones are GSC
bmm[1]	12	13	4	0	0	3	0	1	0
bmm[1]	13	18	2	0	1	0	1	0	0	has out of sync cyst
bmm[1]	14	22	4	1	2	1	1	0	0
bmm[1]	15	31	4	1	3	1	0	0	0
bmm[1]	16	13	0	1	0	0	0	0	0
bmm[1]	17
bmm[1]	18
bmm[1]	19
bmm[1]	20									ambiguous
bmm[1]	21									ambiguous
bmm[rev]	1	8	0	1	0	1	0	1	0
bmm[rev]	2	7	1	0	0	0	0	1	0
bmm[rev]	3	8	0	0	1	0	0	1	0
bmm[rev]	4	8	1	2	1	0	0	0	0
bmm[rev]	5	10	1	0	0	1	0	0	0
bmm[rev]	6	8	0	0	0	0	0	0	0
bmm[rev]	7	8	0	0	0	0	0	0	0
bmm[rev]	8	10	1	0	0	0	0	1	0
bmm[rev]	9	8	1	1	0	0	0	0	0
bmm[rev]	10	9	1	0	3	0	0	0	0
bmm[rev]	11	9	0	0	0	0	0	0	0
bmm[rev]	12	6	1	0	0	0	0	0	0
bmm[rev]	13	8	0	0	0	0	0	0	0
bmm[rev]	14	10	0	0	1	0	0	0	0
bmm[rev]	15	10	0	0	2	0	0	0	0
bmm[1]	1		1	0	2	1	0	0	0
bmm[1]	2		1	0	1	1	1	0	0
bmm[1]	3	14	3	1	4	0	1	1	0
bmm[1]	4	9	1	0	0	0	1	0	0
bmm[1]	5		0	0	1	0	0	1	0
bmm[1]	6	14	2	0	4	1	2	0	0
bmm[1]	7
bmm[1]	8		3	0	0	0	0	0	0
bmm[1]	9	8	0	0	2	1	1	0	0
bmm[1]	10	10	1	0	4	1	0	0	0
bmm[1]	11
bmm[1]	12		2	3	3	3	0	0	0
bmm[1]	13		0	1	1	0	1	0	0
bmm[1]	14		0	0	0	0	0	1	0
bmm[1]	15		1	0	0	0	1	0	0
bmm[1]	16		1							No germline
bmm[1]	17		1	0	3	0	1	0	0
bmm[1]	18
bmm[1]	19	11	0	0	1	2	1	0	0
bmm[1]	20	10	0	1	0	3	0	0	0
bmm[rev]	1	8	1	0	0	0	0	0	0
bmm[rev]	2	8	2	1	0	0	0	0	0
bmm[rev]	3	10	1	1	0	0	0	0	0
bmm[rev]	4	9	4	0	1	1	0	0	0
bmm[rev]	5	9	2	0	0	0	0	0	0
bmm[rev]	6	7	1	0	0	0	0	0	0
bmm[rev]	7	8	0	0	0	0	0	1	0
bmm[rev]	8	7	3	0	0	0	0	0	0
bmm[rev]	9	8	1	0	0	0	0	0	0
bmm[rev]	10	9	0	0	0	0	0	0	0
bmm[rev]	11		2	0	0	0	1	0	0
bmm[rev]	12		0	0	0	0	0	0	0
bmm[rev]	13		0	0	0	0	1	0	0
bmm[rev]	14	9	0	0	1	2	1	0	0
bmm[rev]	15	6	0	0	0	0	0	0	0
bmm[rev]	16	6	0	0	0	1	1	0	0
bmm[rev]	17	7	0	2	1	0	0	0	0
bmm[rev]	18	5	0	0	0	1	2	0	0
bmm[rev]	19	6	0	0	0	0	0	1	0

## Sheet: 4F statistics
Test for normality
bmm[1]:	Shapiro-Wilk normality test
	data: measurements$GSC[measurements$genotype == "bmm[1]"]
	W = 0.85107, p-value = 0.004431
bmm[rev]:	Shapiro-Wilk normality test
	data: measurements$GSC[measurements$genotype == "bmm[rev]"]
	W = 0.92448, p-value = 0.0311
Test for difference
	Kruskal-Wallis rank sum test
	data: GSC by genotype
	Kruskal-Wallis chi-squared = 30.557, df = 1, p-value
	3.241e-08
Test for difference in variance
	F test to compare two variances
	data: measurements$GSC[measurements$genotype == "bmm[rev]"] and measurements$GSC[measurements$genotype == "bmm[1]"]
	F = 0.049533, num df = 30, denom df = 20, p-value =
	5.671e-12
	alternative hypothesis: true ratio of variances is not equal to 1
	95 percent confidence interval:
	0.02109052 0.10873340
	sample estimates:
	ratio of variances
	0.0495332
	Brown-Forsythe Test (alpha = 0.05)
	-------------------------------------------------------------
	data : GSC and genotype
	statistic : 25.94334
	num df : 1
	denom df : 21.34868
	p.value : 4.583741e-05
	Result : Difference is statistically significant.
	-------------------------------------------------------------

## Sheet: Supp 4I statistics
Test for difference
	Kruskal-Wallis rank sum test
	data: ph3overgsc by genotype
	Kruskal-Wallis chi-squared = 1.0065, df = 1, p-value
	0.3157

[truncated: 21 more sheets: Supp 4C, D, Supp 4C statistics, Supp 4D statistics, 4G, K, L, 4G statistics, 4K statistics, 4L statistics, Supp 4E, F, Supp 4E statistics, Supp 4F statistics, Supp 4H, Supp 4H statistics, Supp 4J, Supp 4J statistics, Supp 4K, Supp 4L, Supp 4L statistics, Supp 4O, Supp 4O statistics, Supp 4P …]
